# Supplementary material for: Risks and Benefits of Nalmefene in the Treatment of Adult Alcohol Dependence: A Systematic Literature Review and Meta-Analysis of Published and Unpublished Double-Blind Randomized Controlled Trials
Source: PubMed Central journal article supplement (PMC4687857; doi:10.1371/journal.pmed.1001924), 2015-12-22

## SEARCHES

Records identified from database search:

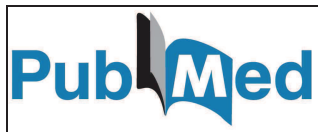

Date: November 19, 2014

Keyword: nalmefene  
Filters activated: Clinical Trial

Results: 65 references

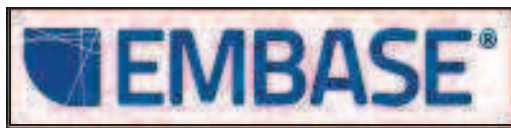

Date: November 21, 2014

KEY ( nalmefen\* OR 6-desoxy-6-methylenaltrexone ) AND ( LIMIT-TO ( EXACTKEYWORD , "Human" ) OR LIMIT-TO ( EXACTKEYWORD , "Humans" ) ) AND ( LIMIT-TO ( EXACTKEYWORD , "Clinical trial" ) OR LIMIT-TO ( EXACTKEYWORD , "Controlled clinical trial" ) OR LIMIT-TO ( EXACTKEYWORD , "Randomized controlled trial" ) OR LIMIT-TO ( EXACTKEYWORD , "Major clinical study" ) OR LIMIT-TO ( EXACTKEYWORD , "Clinical Trials" ) OR LIMIT-TO ( EXACTKEYWORD , "Clinical article" ) ) AND ( EXCLUDE ( EXACTKEYWORD , "Nonhuman" ) OR EXCLUDE ( EXACTKEYWORD , "Animals" ) ) AND ( EXCLUDE ( EXACTKEYWORD , "Review" ) )

Results: 129 references

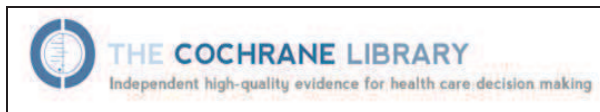

Date: November 19, 2014

Keyword: nalmefene  
Filters activated: Trials

Results: 89 references

Date: November 27, 2014

Keyword: nalmefene

Results: 11 references  
Retained: 3/8 references  
NCT01969617 (COMPLETED) → EXCLUDED  
NCT00811720 (ESENSE1)  
NCT00812461 (ESENSE2)  
NCT00811941 (SENSE)  
NCT02197598 (RECRUITING) → EXCLUDED  
NCT00000437 (COMPLETED) → EXCLUDED  
NCT00000450 (COMPLETED) → EXCLUDED  
NCT02195817 (RECRUITING) → EXCLUDED

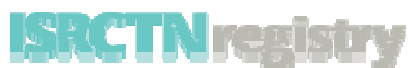

Date: November 27, 2014

Keyword: nalmefene

Results: 1 reference  
Retained: 0 reference

## Lundbeck Clinical Trial Registry

Date: November 27, 2014

Keyword: nalmefene

Results: 3 references  
Retained: 3 references  
Study ID: 12023A (ESENSE2)  
Study ID: 12014A (ESENSE1)  
Study ID: 12013A (SENSE)

Date: December 2, 2014

Sent here:

[http://www.ema.europa.eu/ema/index.jsp?curl=pages/about\\_us/landing/ask\\_ema\\_landing\\_page.jsp&mid=WC0b01ac05806499f0](http://www.ema.europa.eu/ema/index.jsp?curl=pages/about_us/landing/ask_ema_landing_page.jsp&mid=WC0b01ac05806499f0)

Request Reference Number: ASK-6656

Query:

Dear Sirs,

We are currently working on a meta-analysis to assess the efficacy of Nalmefene in the treatment of adults alcohol dependence in order to reduce alcohol consumption (Protocol Registration number on PROSPERO: CRD42014014853, [http://www.crd.york.ac.uk/PROSPERO/display\\_record.asp?ID=CRD42014014853](http://www.crd.york.ac.uk/PROSPERO/display_record.asp?ID=CRD42014014853)).

We carried out a literature search aimed at identifying the RCTs eligible for our analysis. This search was conducted in PubMed, Embase and the Cochrane Library. We also searched the ClinicalTrials.gov database and other relevant websites. Presently, we are attempting to identify further RCTs.

Would you be able to tell us if any clinical trial evaluating Nalmefene in the treatment of adults alcohol dependence was declared to your agency? If so, we would be very grateful if you could send us a copy of the results that are available. They will be carefully referenced.

We look forward to your answering and we thank you in advance.

We would like to express our gratitude for all your help in this matter,

Dr Florian Naudet, MD, PhD

Centre d'Investigation Clinique CIC-P INSERM 1414, Hôpital de Pontchaillou, Centre Hospitalier Universitaire de Rennes & Université de Rennes 1  
2 Rue Henri le Guilloux 35000 Rennes  
Rennes, France  
[Florian.NAUDET@chu-rennes.fr](mailto:Florian.NAUDET@chu-rennes.fr)

Results: 8 references

Retained: 7 references

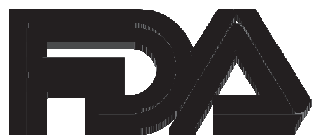

Date: December 2, 2014

Sent here:

Food and Drug Administration (FDA)  
Sarah Kotler, Acting Director  
Division of Freedom of Information, OES  
U.S. Food & Drug Administration  
5630 Fishers Lane  
Room-1035  
Rockville, Maryland 20857  
301-796-3900 (main)  
301-827-9267 (fax)

Query:

Food and Drug Administration (FDA)  
Sarah Kotler, Acting Director  
Division of Freedom of Information, OES  
U.S. Food & Drug Administration  
5630 Fishers Lane  
Room-1035  
Rockville, Maryland 20857  
301-796-3900 (main)  
301-827-9267 (fax)

Rennes, December 2014 the 2<sup>nd</sup>,

Dear Sirs,

We are currently working on a meta-analysis to assess the efficacy of Nalmefene in the treatment of adults alcohol dependence in order to reduce alcohol consumption (Protocol Registration number on PROSPERO: CRD42014014853, [http://www.crd.york.ac.uk/PROSPERO/display\\_record.asp?ID=CRD42014014853](http://www.crd.york.ac.uk/PROSPERO/display_record.asp?ID=CRD42014014853)).

We carried out a literature search aimed at identifying the RCTs eligible for our analysis. This search was conducted in PubMed, Embase and the Cochrane Library. We also searched the ClinicalTrials.gov database and other relevant websites. Presently, we are attempting to identify further RCTs.

Would you be able to tell us if any clinical trial evaluating Nalmefene in the treatment of adults alcohol dependence was declared to your agency? If so, we would be very grateful if you could send us a copy of the results that are available. They will be carefully referenced.

We look forward to your answering and we thank you in advance.

We would like to express our gratitude for all your help in this matter,

Dr Florian Naudet, MD, PhD

Service de psychiatrie adulte et de psychologie médicale

Centre d'Investigation Clinique CIC-P INSERM 1414, Hôpital de Pontchaillou, Centre Hospitalier Universitaire de  
Rennes & Université de Rennes 1

2 Rue Henri le Guilloux 35000 Rennes

Rennes, France

Florian.NAUDET@chu-rennes.fr

Results: 0 reference

Answer from FDA:

“My apologies. I had to be unexpectedly away from the office. Let me try and explain some of the issues with your FOIA request 2015-71. You are seeking information about whether there are any trials currently in process about a particular indication. FDA does not discuss information or release information about pending trials or applications. This type of information is generally considered to be confidential commercial information and therefore not releasable before a product is approved. I searched to see if we had any approved drug products for the treatment you have specified and I don't see any for this product under the product name Nalfemene. There is a product Vivitrol (naltrexone) which was approved for a similar indication. If you would like the review package for that product we would be happy to send that to you under FOIA. Please confirm whether you would like the Vivitrol approval package.”

## SUMMARY OF INCLUDED STUDIES

**WebApp 1. Summary of included studies evaluating the efficacy of nalmefene in the treatment of adult alcohol dependence (main and sensitivity analyses).**

| Study (EMA Study ID)                  | Participants                                                                                                                                                                                       | Nalmefene Dose*            | Study Duration (Weeks)        | Sponsor                             | Health Outcomes Reported in the Publication | Number of Patients           | Age (Years), Mean ± Standard Deviation       | Sex (Women), <i>n</i> (Percent)         |
|---------------------------------------|----------------------------------------------------------------------------------------------------------------------------------------------------------------------------------------------------|----------------------------|-------------------------------|-------------------------------------|---------------------------------------------|------------------------------|----------------------------------------------|-----------------------------------------|
| Gual et al. [24] (12023A)†            | “Patients were recruited from in- and out-patient clinics, from the study site’s patient pool, and by spontaneous referrals to the study site.”                                                    | 20 mg/d (as needed)        | 24                            | Lundbeck                            | No                                          | Nalmefene: 358; placebo: 360 | Nalmefene: 45.1 ± 10.7; placebo: 44.4 ± 10.7 | Nalmefene: 92 (26%); placebo: 104 (29%) |
| Mann et al. [25] (12014A)†            | “Patients were recruited from in- and out-patient clinics, including both spontaneous referrals and referrals resulting from special advertisements.”                                              | 20 mg/d (as needed)        | 24                            | Lundbeck                            | No                                          | Nalmefene: 306; placebo: 298 | Nalmefene: 51.0 ± 10.1; placebo: 52.1 ± 9.0  | Nalmefene: 102 (33%); placebo: 96 (32%) |
| Karhuvaara et al. [26] (CPH-101-801)† | “The subjects were recruited mainly by means of advertisements posted in newspapers.”                                                                                                              | 10 to 40 mg/d (as needed)  | 28                            | Biotie Therapies                    | No                                          | Nalmefene: 242; placebo: 161 | Nalmefene: 49.5 ± 9.1; placebo: 48.8 ± 8.4   | Nalmefene: 46 (19%); placebo: 29 (18%)  |
| CPH-101-0701†                         | “Subjects were recruited through 3 channels: subjects were already patients of the investigator/referred to the sites by general practitioners/contacted the sites after seeing an advertisement.” | 10 to 40 mg/d (as needed)  | 28                            | Biotie Therapies                    | Unpublished                                 | Nalmefene: 85; placebo: 82   | Nalmefene: 45.8 ± 8.6; placebo: 44.8 ± 10.4  | Nalmefene: 33 (39%); placebo: 31 (38%)  |
| van den Brink et al. [27] (12013A)†   | “Patients were recruited from outpatient clinics, from the study sites’ own patient pool, by referrals to the study site, or by using advertisements.”                                             | 20 mg/d (as needed)        | 52 + 4 wk of safety follow-up | Lundbeck                            | No                                          | Nalmefene: 509; placebo: 166 | Nalmefene: 44.3 ± 11.2; placebo: 44.3 ± 12   | Nalmefene: 116 (23%); placebo: 39 (23%) |
| Mason et al. [28]‡                    | “Potential subjects responding to Public Service Announcements advertising studies for alcoholics were evaluated for study inclusion and exclusion criteria.”                                      | 20 mg twice daily          | 12                            | Baker Norton Pharmaceuticals        | No                                          | Nalmefene: 7; placebo: 7     | 42.0 ± 9.4**                                 | 6 (29%)**                               |
| Mason et al. [29]‡                    | “Subjects were alcohol-dependent outpatients recruited primarily through advertisements and press releases.”                                                                                       | 10 mg or 40 mg twice daily | 12                            | National grant and Ivax Corporation | No                                          | Nalmefene: 70; placebo: 35   | Nalmefene: 41.9 ± 8.2; placebo: 41.7 ± 9.9   | Nalmefene: 22 (31%); placebo: 13 (37%)  |
| Anton et al. [30] (CPH-101-0299)‡     | “Individuals were recruited from clinical referrals and direct advertisement.”                                                                                                                     | 20 mg/d                    | 12                            | Biotie Therapies                    | No                                          | Nalmefene: 66; placebo: 68   | Nalmefene: 46.5 ± 10.9; placebo: 45.1 ± 11.1 | Nalmefene: 18 (27%); placebo: 15 (22%)  |
| CPH-101-0399‡                         | “Male and female subjects responding to advertisements were evaluated for their eligibility to participate.”                                                                                       | 40 mg/d                    | 16                            | Contral Pharma                      | Unpublished                                 | Nalmefene: 50; placebo: 50   | Nalmefene: 50.0 ± 9.0; placebo: 48.0 ± 9.0   | Nalmefene: 6 (12%); placebo: 11 (22%)   |

\*Expressed in nalmefene HCL. Nalmefene HCL 20 mg corresponds to 18.06 mg nalmefene base. \*\*Only overall data available.

†Studies included in the main and sensitivity analyses. ‡Studies included only in sensitivity analysis.



**WebApp 2. Quality assessment of included studies evaluating the efficacy of nalmefene in the treatment of adult alcohol dependence.**

| <b>Study</b>                    | <b>Sequence generation</b> | <b>Allocation concealment</b> | <b>Blinding</b> | <b>Incomplete outcome data</b> | <b>Selective outcome reporting</b> | <b>Other source of bias</b> |
|---------------------------------|----------------------------|-------------------------------|-----------------|--------------------------------|------------------------------------|-----------------------------|
| Gual et al. (12023A)            | Low risk                   | Low risk                      | Low risk        | High risk                      | Low risk                           | Low risk                    |
| Mann et al. (12014A)            | Low risk                   | Low risk                      | Low risk        | High risk                      | Low risk                           | Low risk                    |
| Karhuvaara et al. (CPH-101-801) | Low risk                   | Low risk                      | Low risk        | High risk                      | Low risk                           | Low risk                    |
| CPH-101-0701                    | Low risk                   | Low risk                      | Low risk        | High risk                      | Low risk                           | Low risk                    |
| van den Brink et al. (12013A)   | Low risk                   | Low risk                      | Low risk        | High risk                      | Low risk                           | Low risk                    |
| Mason et al. (1994)             | Unclear risk               | Unclear risk                  | Low risk        | Unclear risk                   | High risk                          | Low risk                    |
| Mason et al. (1999)             | Unclear risk               | Unclear risk                  | Low risk        | Unclear risk                   | High risk                          | Low risk                    |
| Anton et al. (CPH-101-0299)     | Unclear risk               | Low risk                      | Low risk        | High risk                      | Low risk                           | Low risk                    |
| CPH-101-0399                    | Low risk                   | Low risk                      | Low risk        | Low risk                       | Low risk                           | Low risk                    |

Each study was assessed for methodological quality using the Cochrane Collaboration tool for assessing risk of bias.

## MAIN ANALYSIS

## Mortality at 6 months

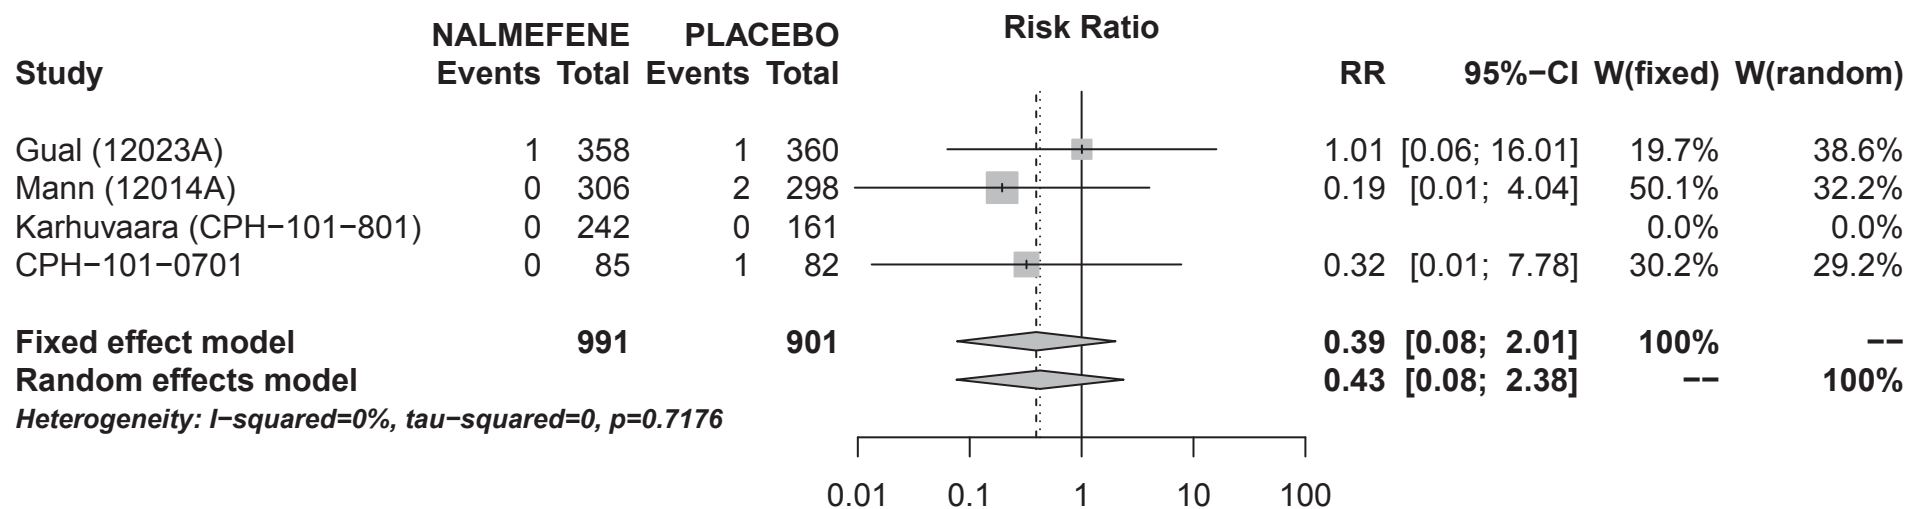

## QoL:SF-36 Physical component summary score at 6 months

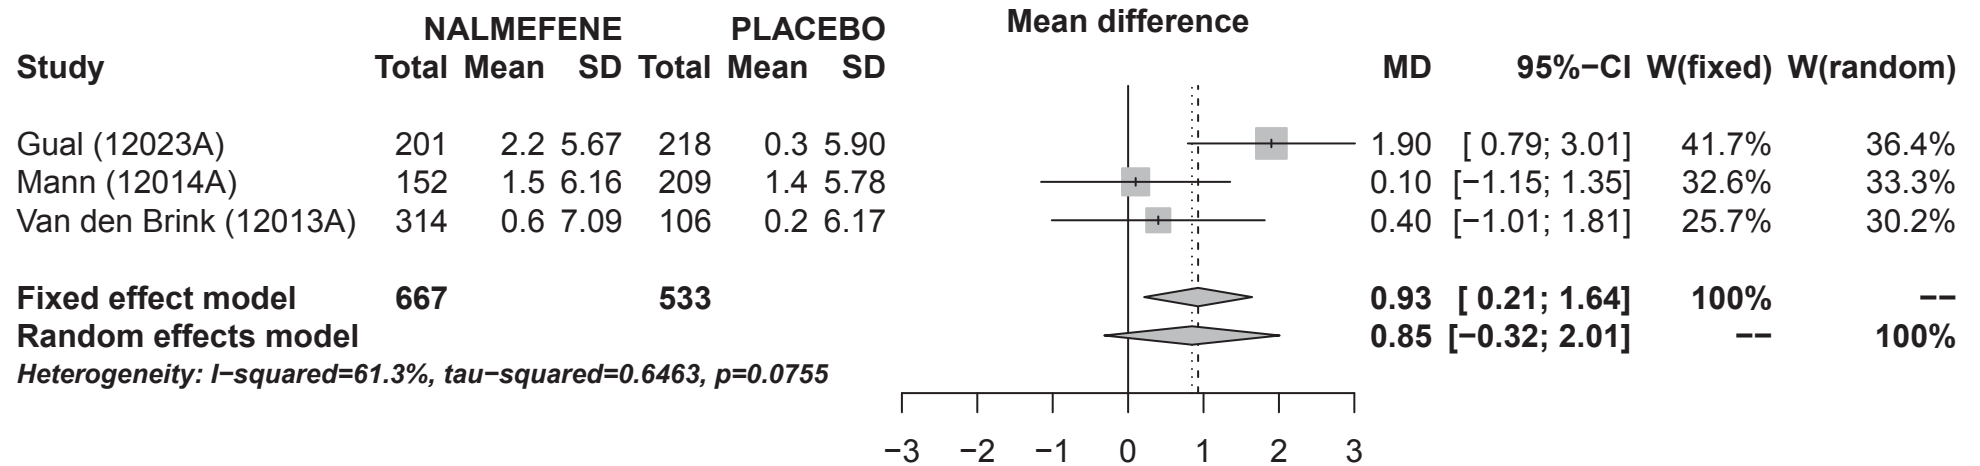

## QoL:SF-36 Mental component summary score at 6 months

| Study                                                              | NALMEFENE  |      |       | PLACEBO    |      |       | Mean difference | MD | 95%-CI | W(fixed) | W(random) |
|--------------------------------------------------------------------|------------|------|-------|------------|------|-------|-----------------|----|--------|----------|-----------|
|                                                                    | Total      | Mean | SD    | Total      | Mean | SD    |                 |    |        |          |           |
| Gual (12023A)                                                      | 201        | 6.8  | 11.34 | 218        | 3.6  | 10.34 |                 |    |        |          |           |
| Mann (12014A)                                                      | 152        | 3.2  | 9.86  | 209        | 2.5  | 10.12 |                 |    |        |          |           |
| Van den Brink (12013A)                                             | 314        | 4.2  | 10.63 | 106        | 5.1  | 9.26  |                 |    |        |          |           |
| <b>Fixed effect model</b>                                          | <b>667</b> |      |       | <b>533</b> |      |       |                 |    |        |          |           |
| <b>Random effects model</b>                                        |            |      |       |            |      |       |                 |    |        |          |           |
| <i>Heterogeneity: I-squared=73.2%, tau-squared=3.114, p=0.0241</i> |            |      |       |            |      |       |                 |    |        |          |           |

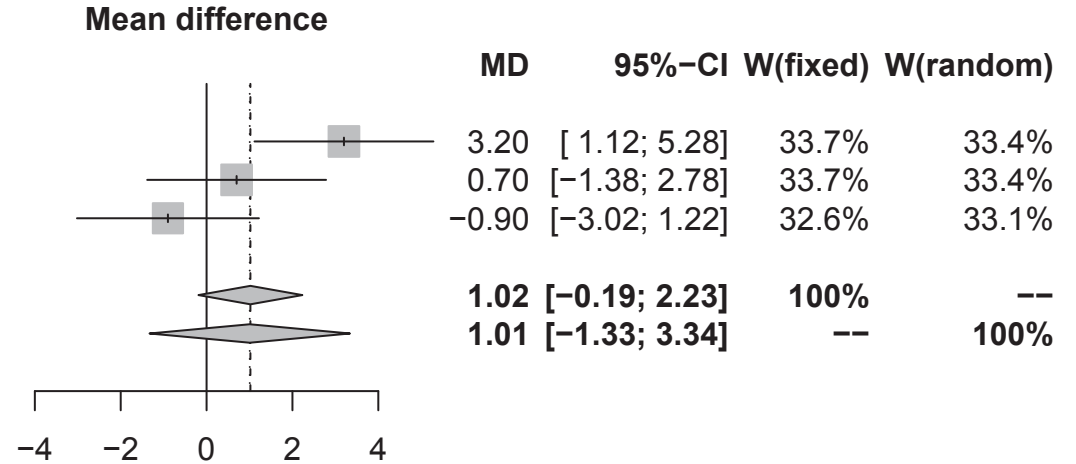

## Monthly number of HDDs at 6 months

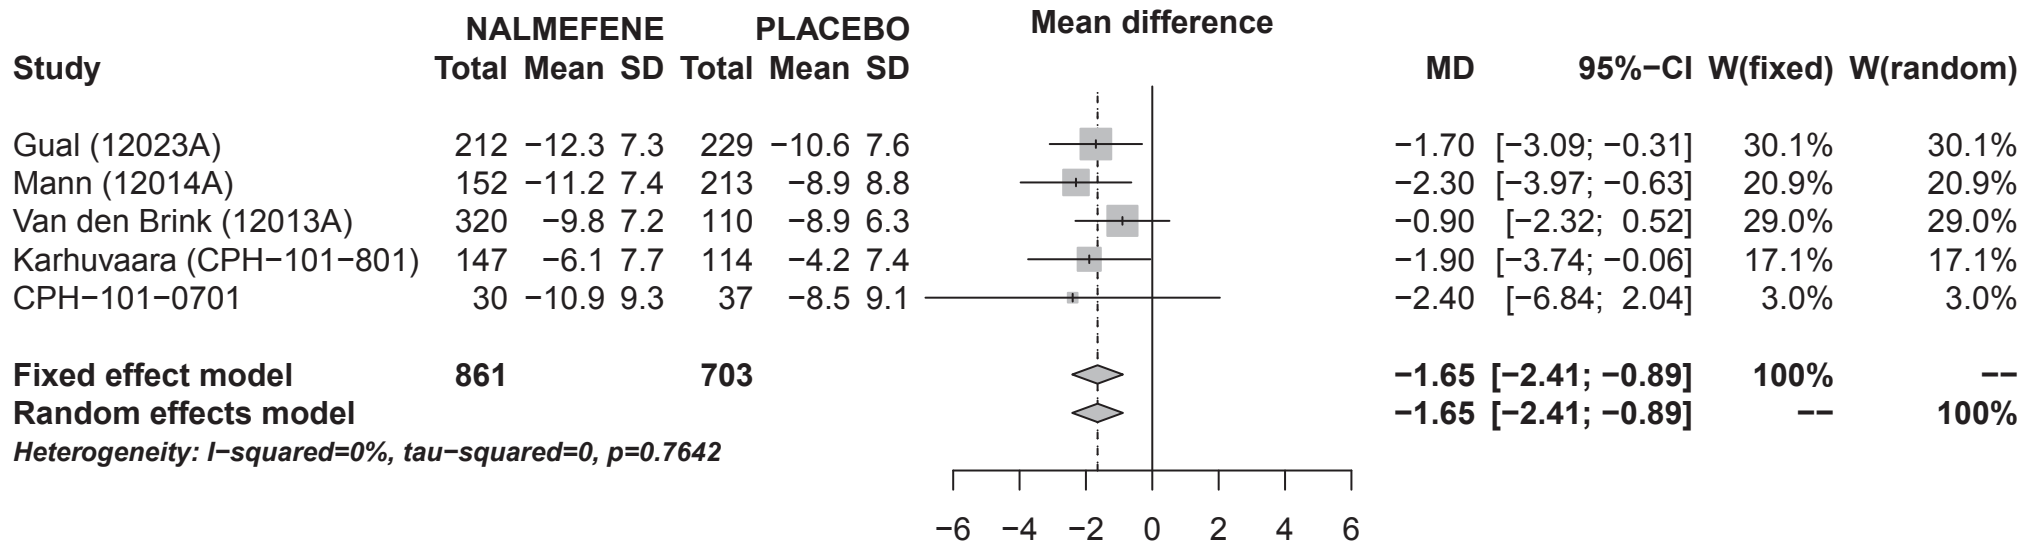

## Monthly number of HDDs (BOCF) at 6 months

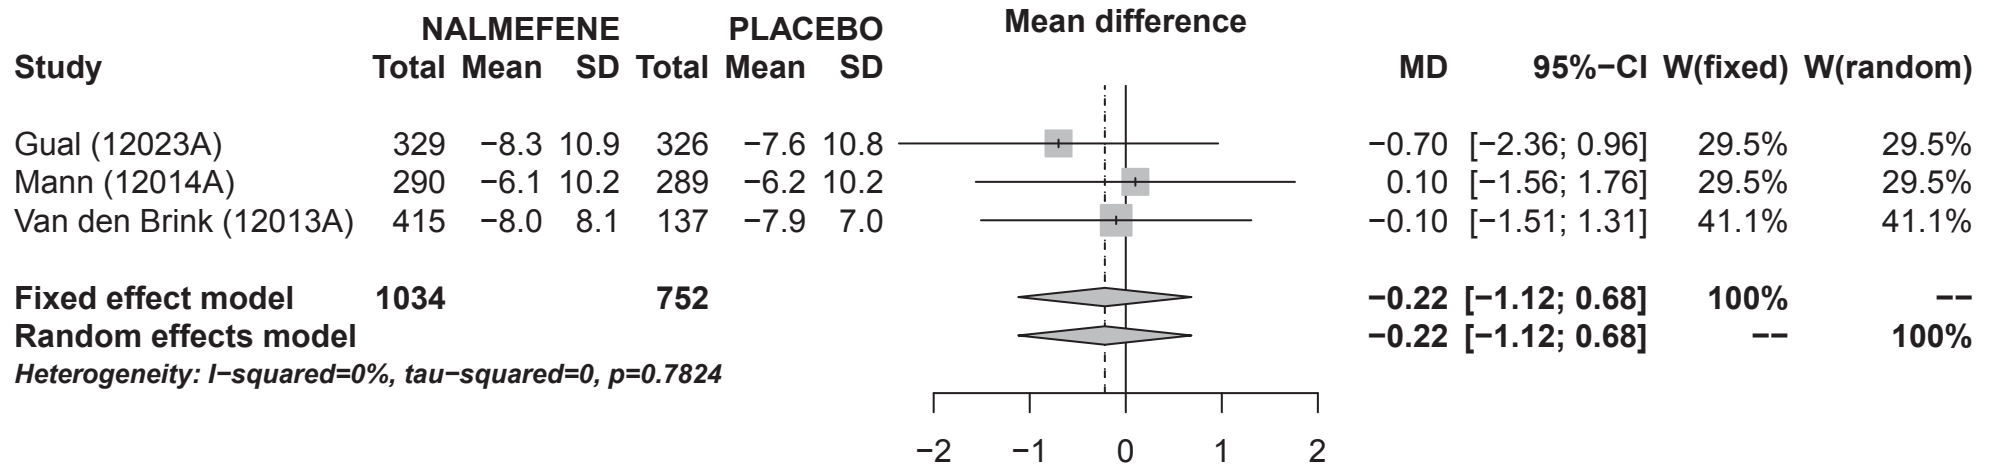

## Total alcohol consumption at 6 months

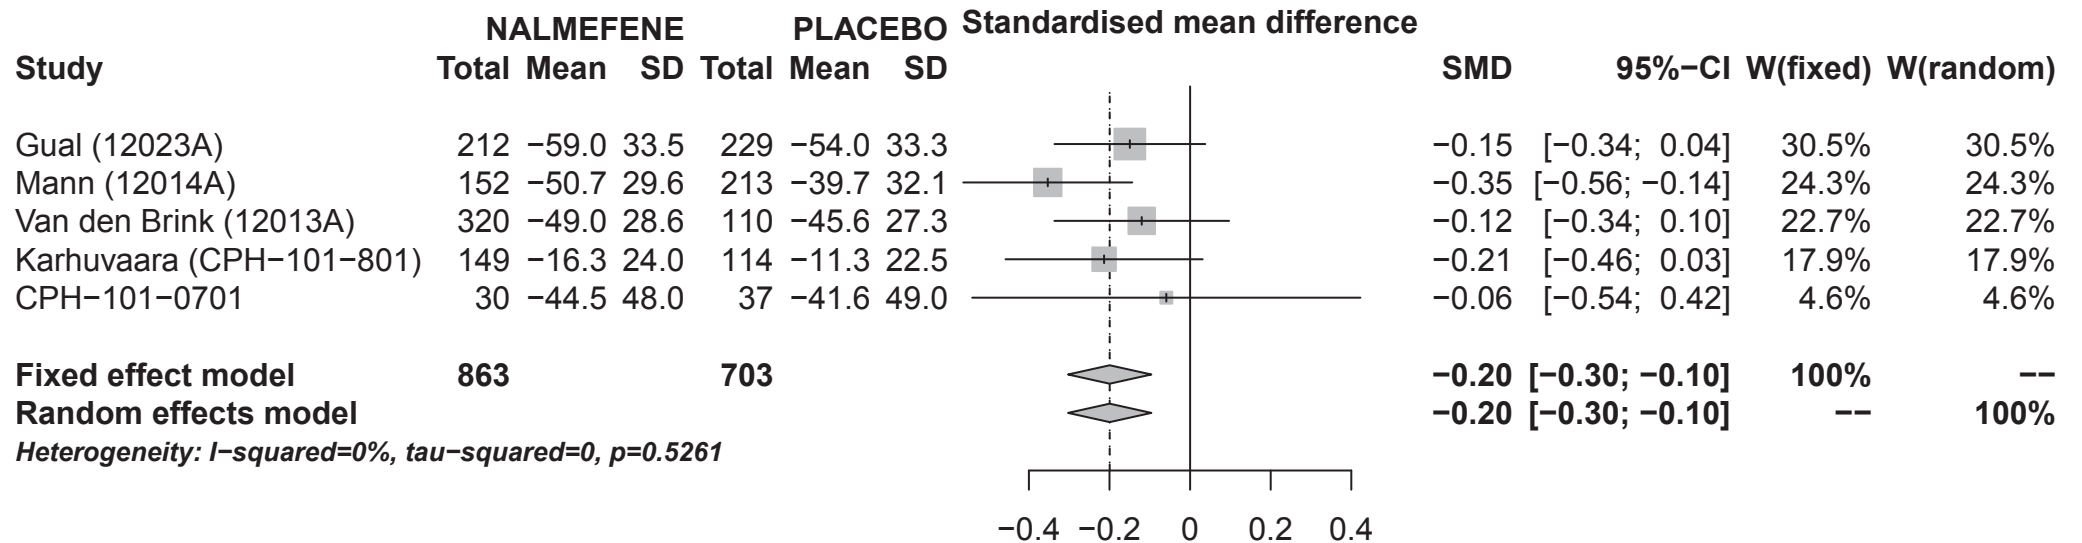



## Total alcohol consumption (BOCF) at 6 months

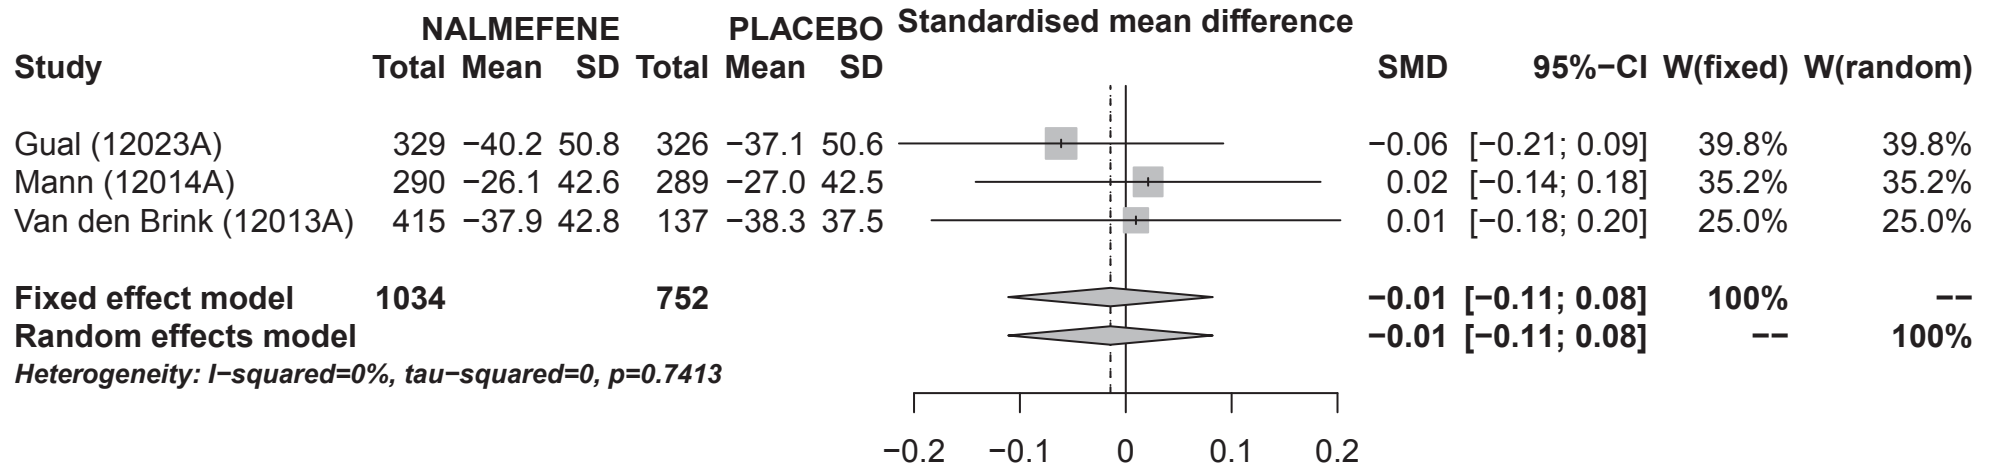

## Response at 6 months

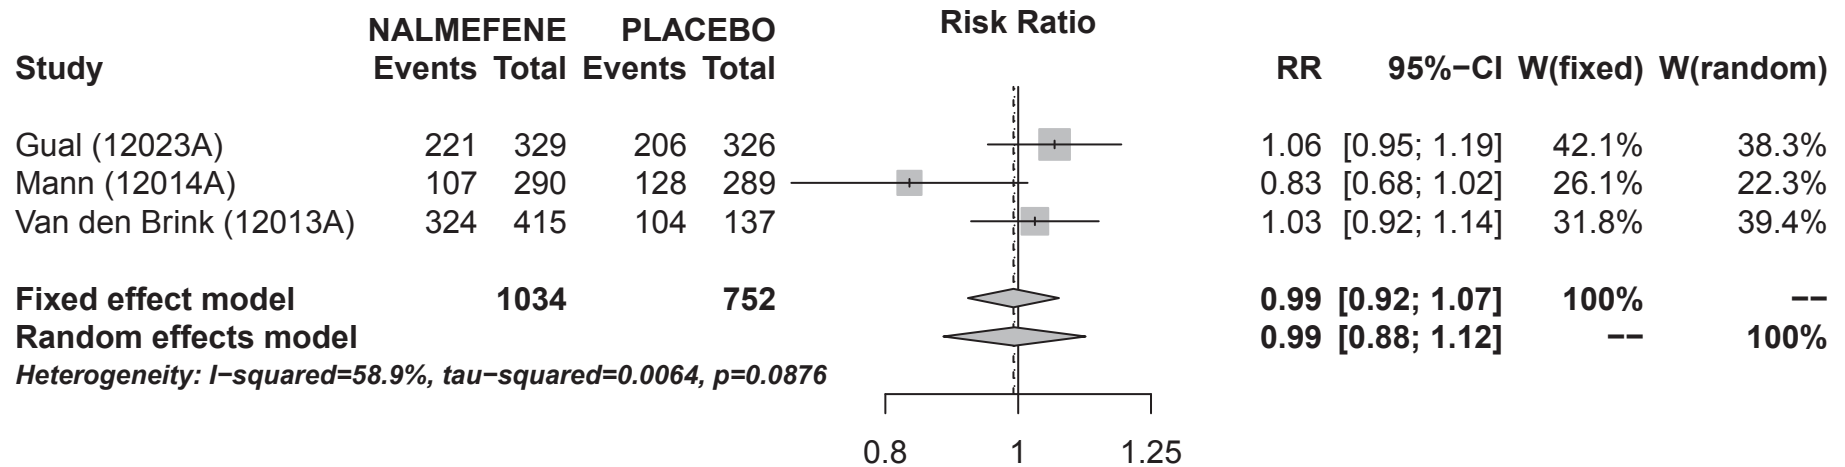

## Response (LFU=F) at 6 months

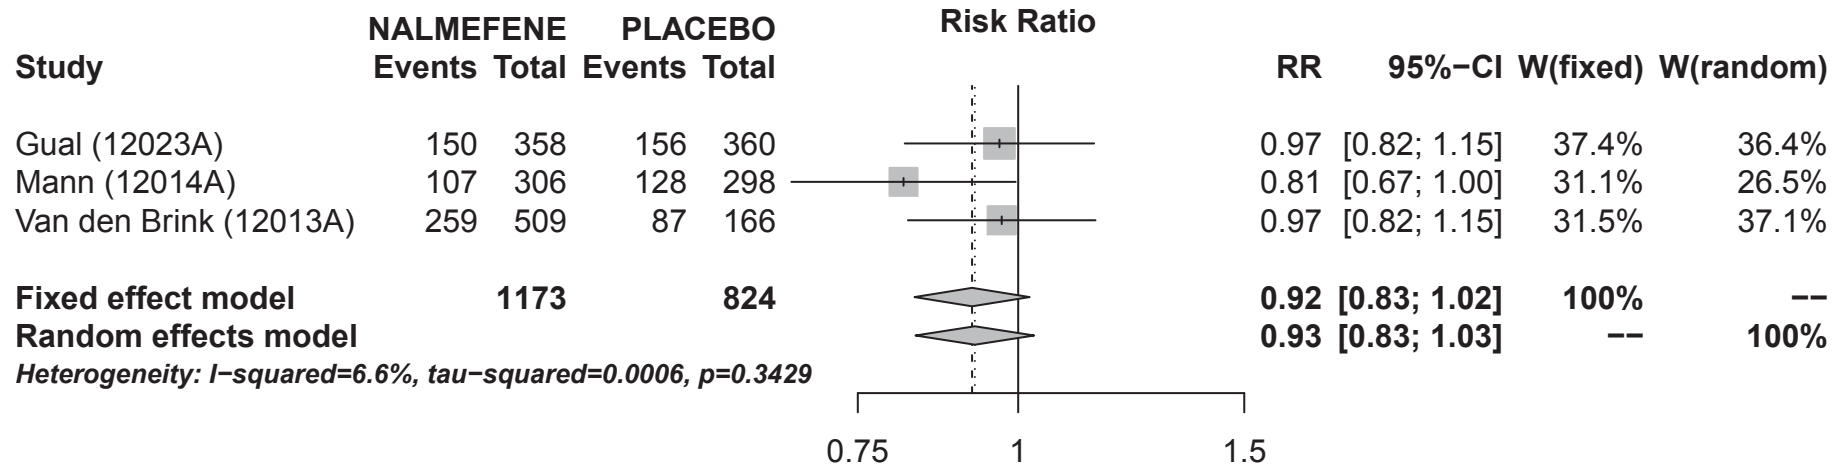

## DrInC score at 6 months

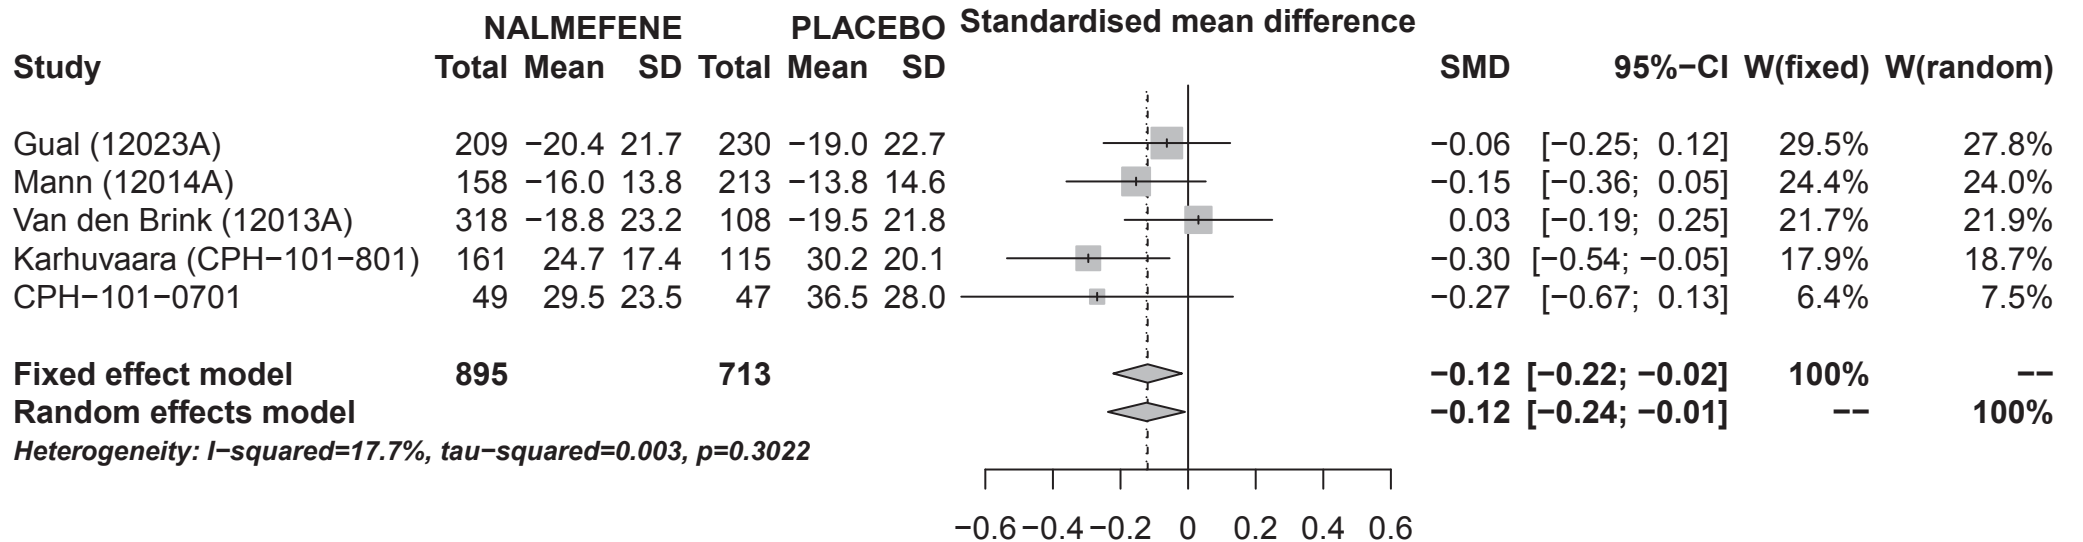

## Clinical Global Impression–Severity score at 6 months

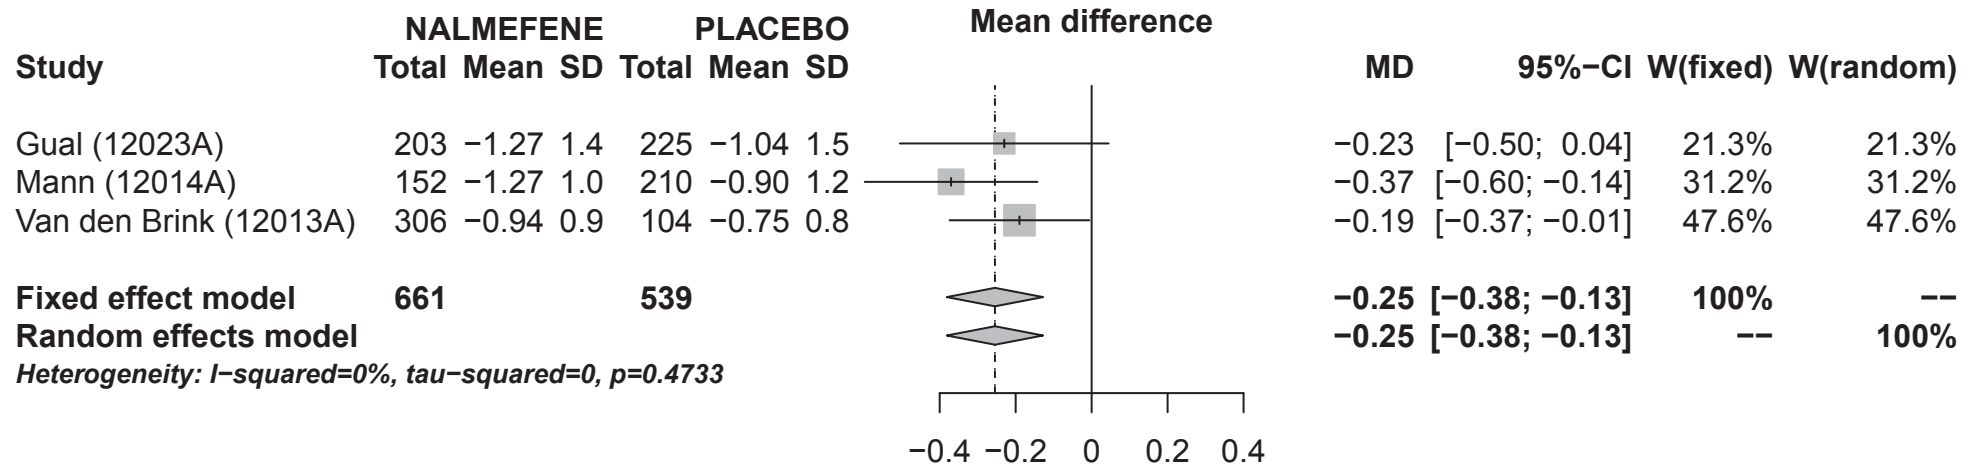

## Alcohol Dependence Scale score at 6 months

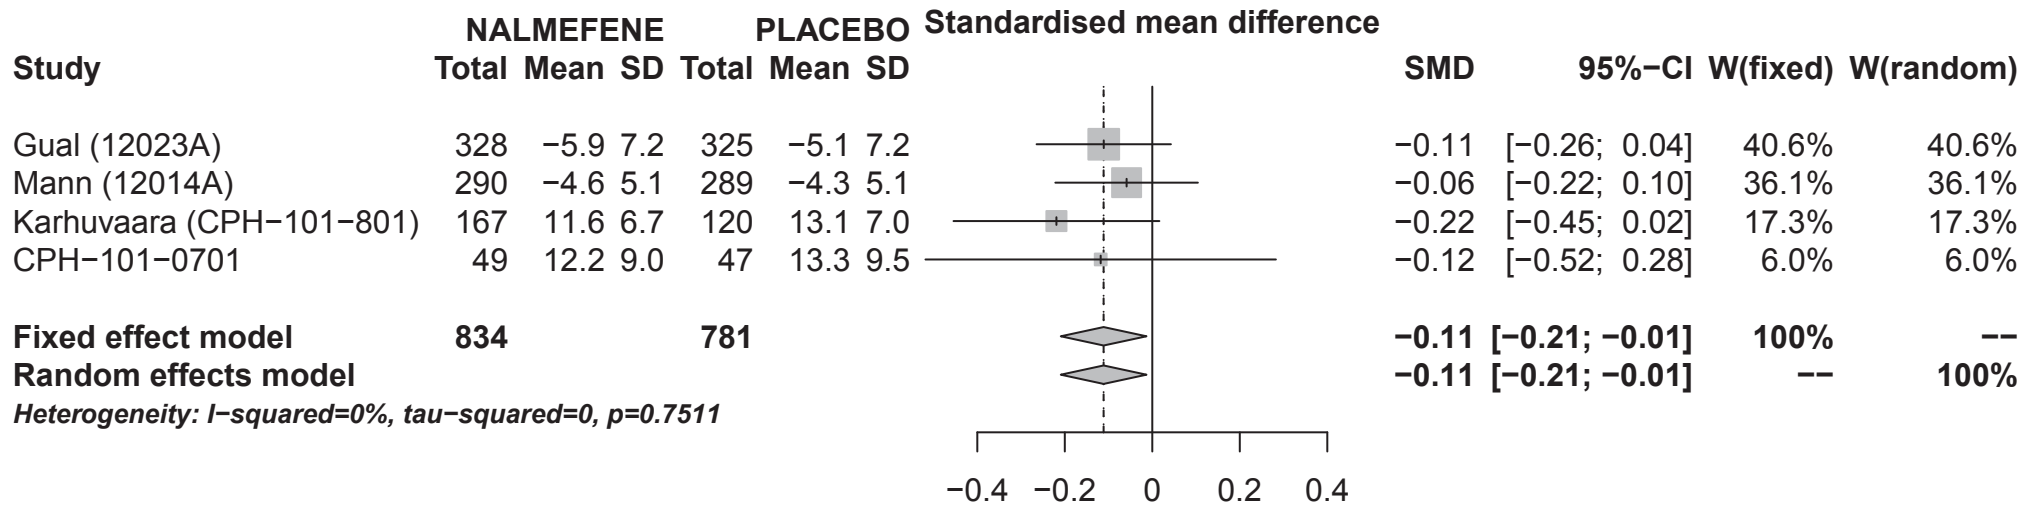

## Gamma-Glutamyltransferase at 6 months

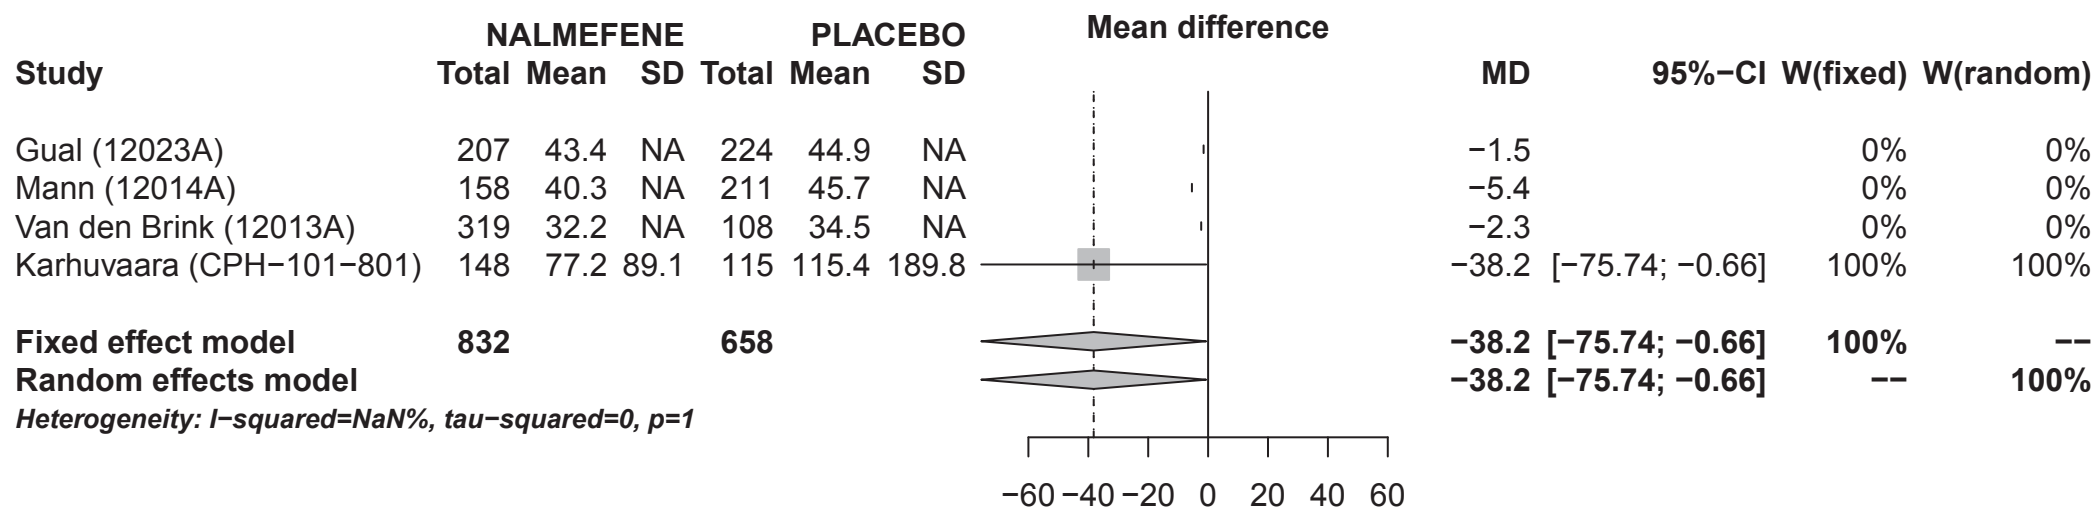

## Alanine-aminotransferase at 6 months

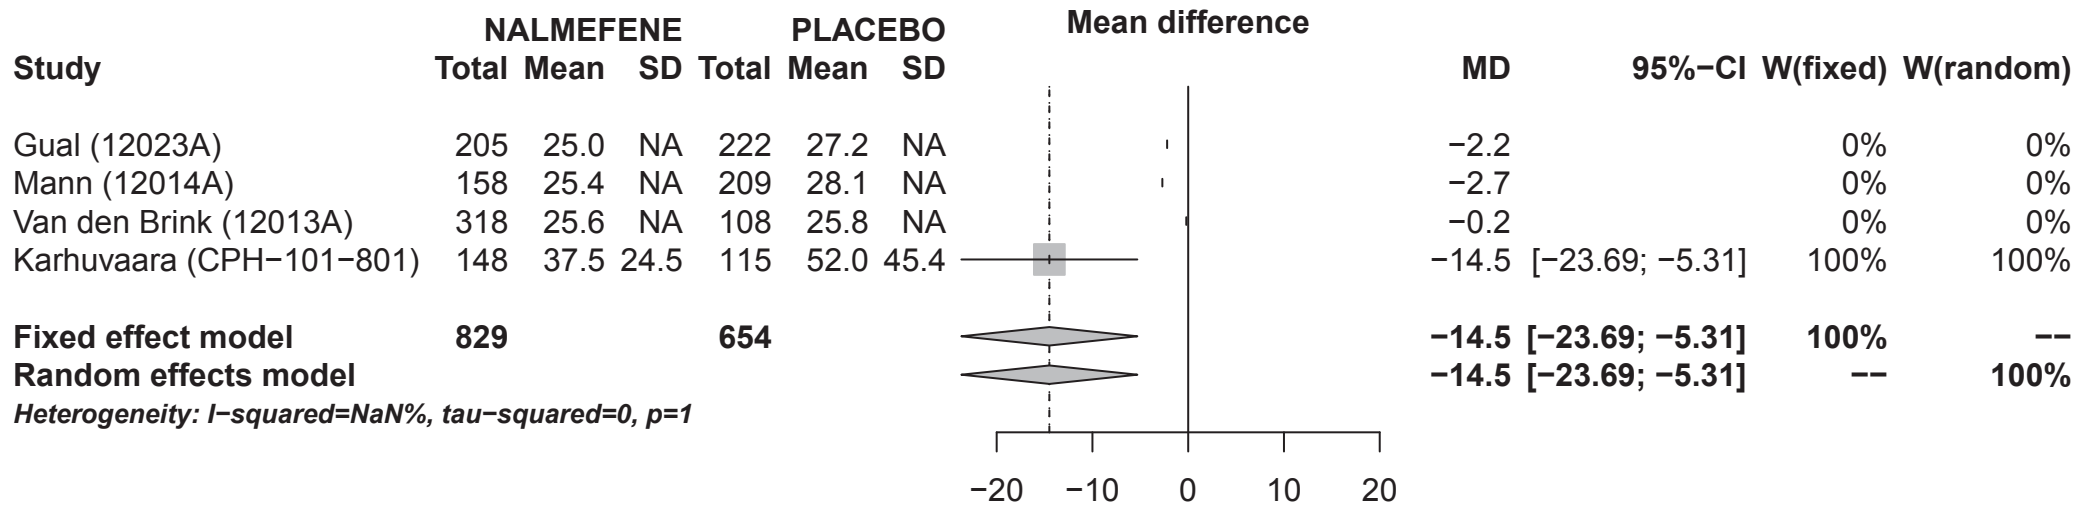



## Mean corpuscular volume at 6 months

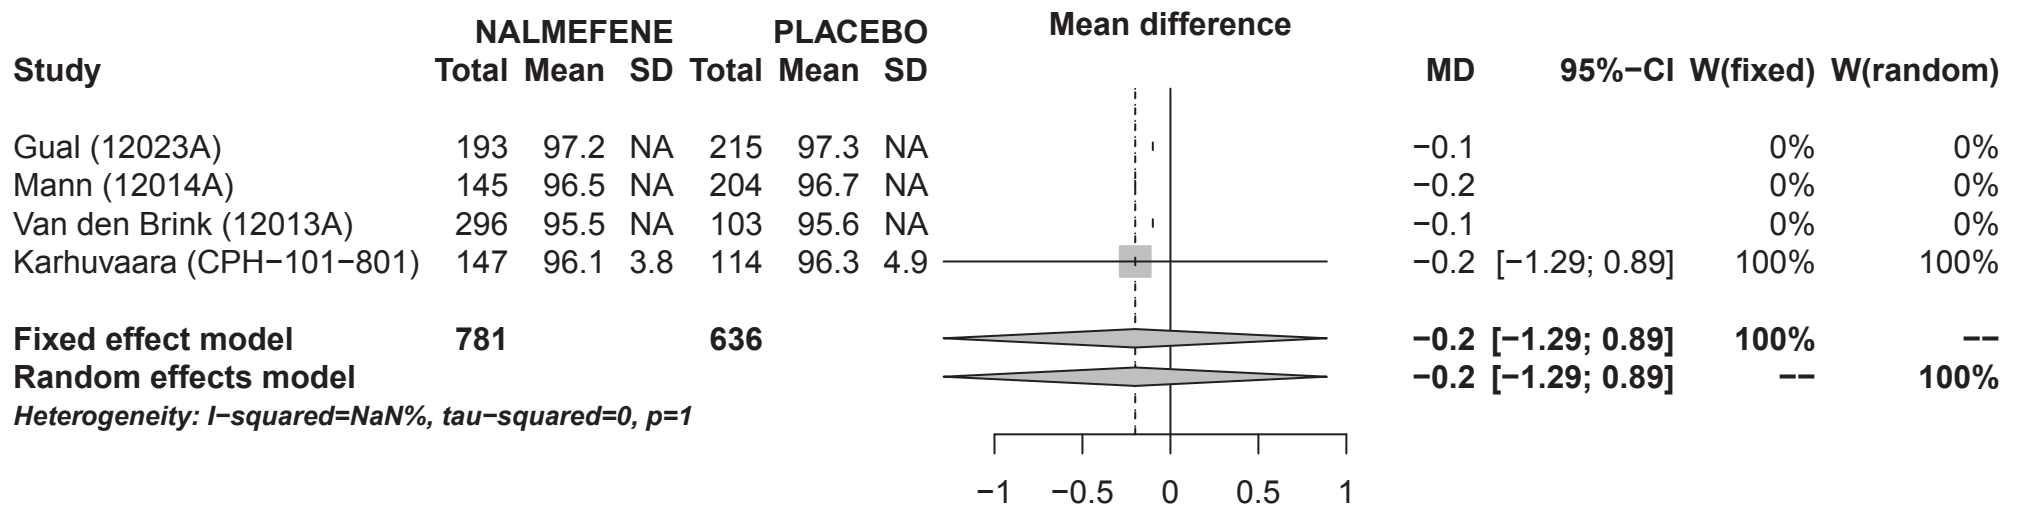

## Carbohydrate-deficient transferrin at 6 months

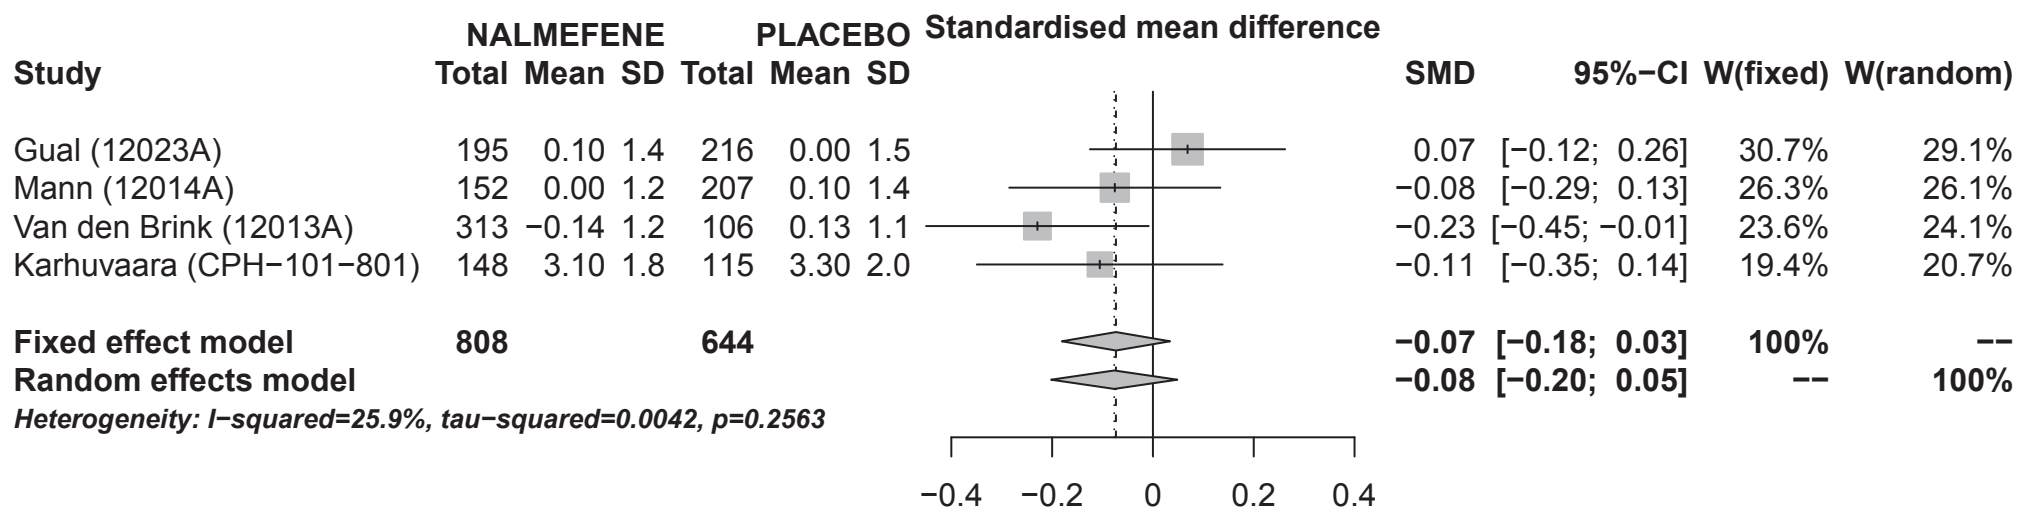

## Adverse events at 6 months

| Study                       | NALMEFENE  |       | PLACEBO    |       | Risk Ratio | RR          | 95%-CI              | W(fixed)    | W(random)   |
|-----------------------------|------------|-------|------------|-------|------------|-------------|---------------------|-------------|-------------|
|                             | Events     | Total | Events     | Total |            |             |                     |             |             |
| Gual (12023A)               | 232        | 341   | 199        | 337   |            | 1.15        | [1.03; 1.29]        | 32.2%       | 19.3%       |
| Mann (12014A)               | 246        | 302   | 198        | 296   |            | 1.22        | [1.11; 1.34]        | 32.2%       | 27.4%       |
| Karhuvaara (CPH-101-801)    | 230        | 242   | 131        | 161   |            | 1.17        | [1.08; 1.26]        | 25.3%       | 40.6%       |
| CPH-101-0701                | 75         | 85    | 63         | 82    |            | 1.15        | [1.00; 1.32]        | 10.3%       | 12.7%       |
| <b>Fixed effect model</b>   | <b>970</b> |       | <b>876</b> |       |            | <b>1.18</b> | <b>[1.11; 1.24]</b> | <b>100%</b> | <b>--</b>   |
| <b>Random effects model</b> |            |       |            |       |            | <b>1.18</b> | <b>[1.12; 1.24]</b> | <b>--</b>   | <b>100%</b> |

Heterogeneity: I-squared=0%, tau-squared=0, p=0.859

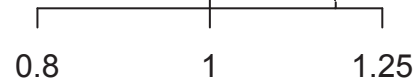

## Adverse events (LFU=F) at 6 months

| Study                       | NALMEFENE  |       | PLACEBO    |       | Risk Ratio | RR          | 95%-CI              | W(fixed)    | W(random)   |
|-----------------------------|------------|-------|------------|-------|------------|-------------|---------------------|-------------|-------------|
|                             | Events     | Total | Events     | Total |            |             |                     |             |             |
| Gual (12023A)               | 249        | 358   | 222        | 360   |            | 1.13        | [1.01; 1.25]        | 34.3%       | 21.7%       |
| Mann (12014A)               | 250        | 306   | 200        | 298   |            | 1.22        | [1.11; 1.34]        | 31.4%       | 27.0%       |
| Karhuvaara (CPH-101-801)    | 230        | 242   | 131        | 161   |            | 1.17        | [1.08; 1.26]        | 24.4%       | 39.1%       |
| CPH-101-0701                | 75         | 85    | 63         | 82    |            | 1.15        | [1.00; 1.32]        | 9.9%        | 12.2%       |
| <b>Fixed effect model</b>   | <b>991</b> |       | <b>901</b> |       |            | <b>1.17</b> | <b>[1.11; 1.23]</b> | <b>100%</b> | <b>--</b>   |
| <b>Random effects model</b> |            |       |            |       |            | <b>1.17</b> | <b>[1.11; 1.23]</b> | <b>--</b>   | <b>100%</b> |

*Heterogeneity: I-squared=0%, tau-squared=0, p=0.7556*

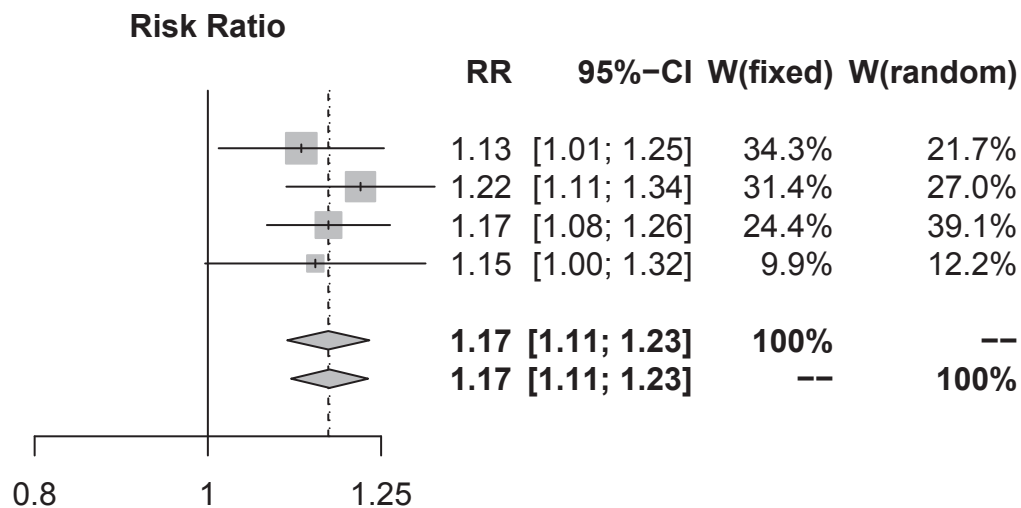

## Serious adverse events at 6 months

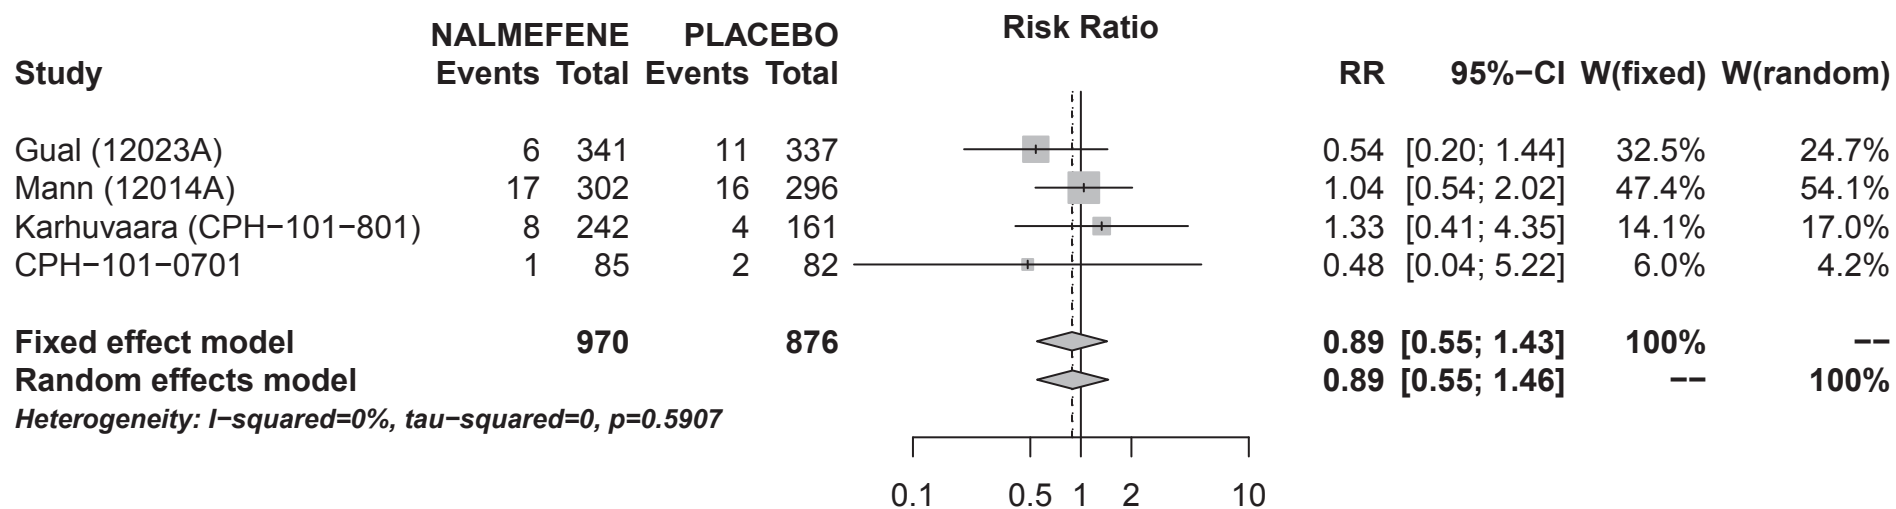

## Serious adverse events (LFU=F) at 6 months

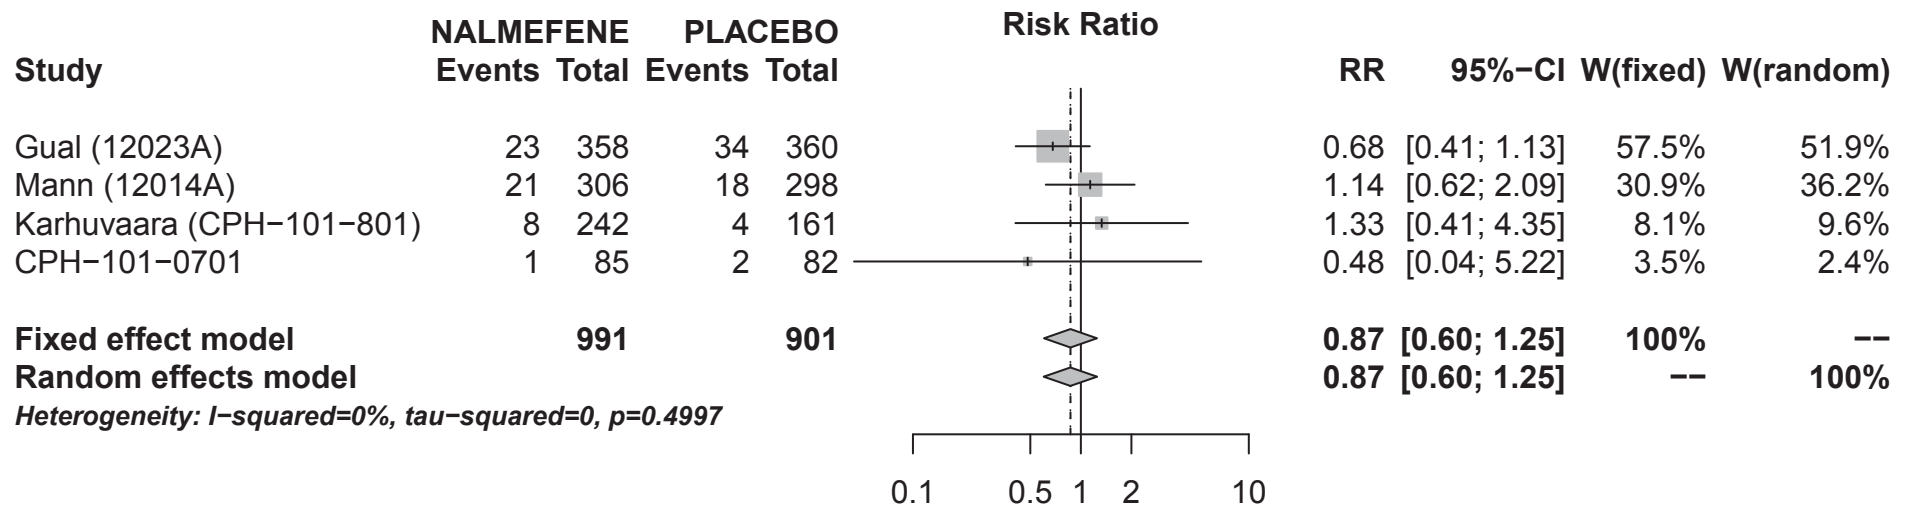

## Withdrawal from the study at 6 months

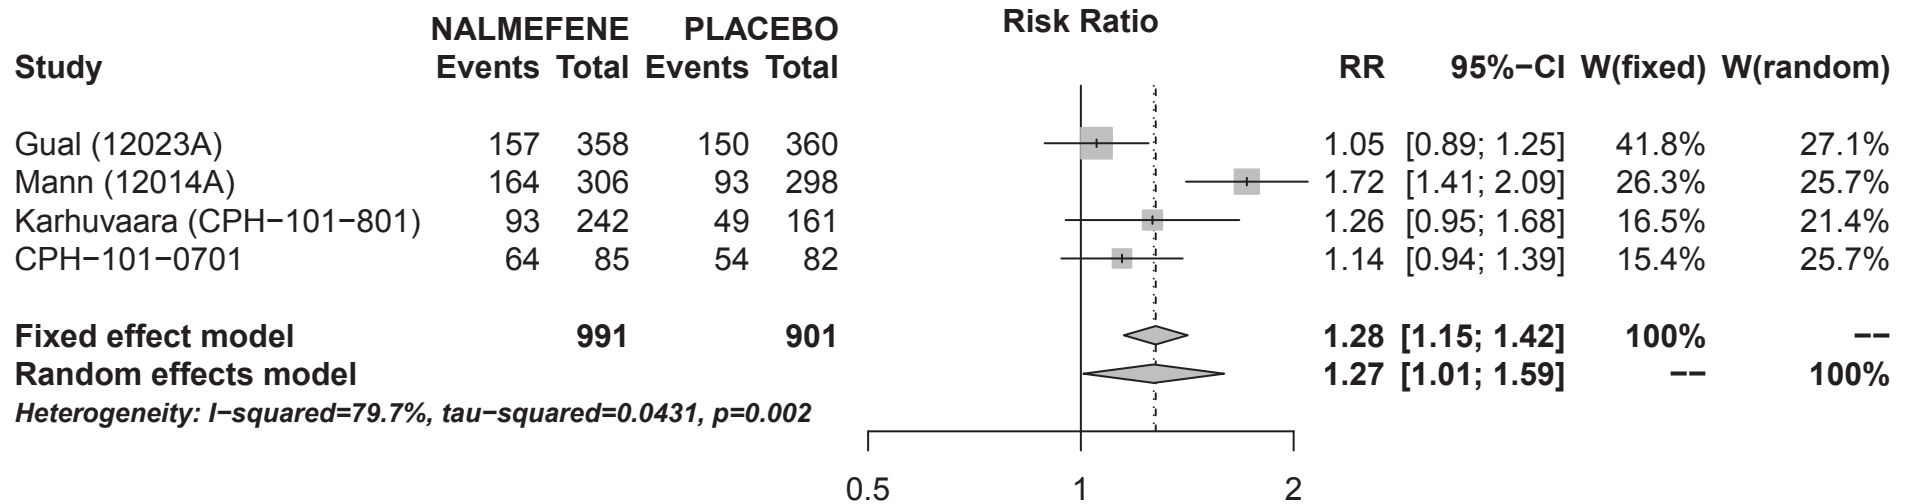

## Withdrawal from the study for safety reasons at 6 months

| Study                       | NALMEFENE  |       | PLACEBO    |       | Risk Ratio | RR                       | 95%-CI      | W(fixed)    | W(random) |
|-----------------------------|------------|-------|------------|-------|------------|--------------------------|-------------|-------------|-----------|
|                             | Events     | Total | Events     | Total |            |                          |             |             |           |
| Gual (12023A)               | 15         | 358   | 8          | 360   |            | 1.89 [0.81; 4.39]        | 22.9%       | 25.6%       |           |
| Mann (12014A)               | 62         | 306   | 20         | 298   |            | 3.02 [1.87; 4.87]        | 58.1%       | 39.5%       |           |
| Karhuvaara (CPH-101-801)    | 38         | 242   | 3          | 161   |            | 8.43 [2.65; 26.84]       | 10.3%       | 17.6%       |           |
| CPH-101-0701                | 20         | 85    | 3          | 82    |            | 6.43 [1.99; 20.82]       | 8.8%        | 17.3%       |           |
| <b>Fixed effect model</b>   | <b>991</b> |       | <b>901</b> |       |            | <b>3.62 [2.50; 5.23]</b> | <b>100%</b> | <b>--</b>   |           |
| <b>Random effects model</b> |            |       |            |       |            | <b>3.65 [2.02; 6.63]</b> | <b>--</b>   | <b>100%</b> |           |

*Heterogeneity: I-squared=48.3%, tau-squared=0.1742, p=0.1218*

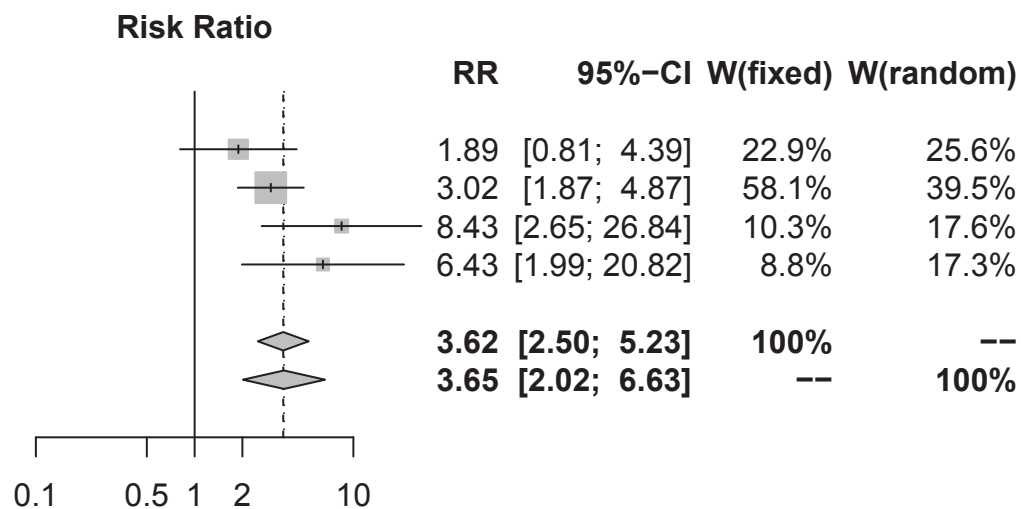



## Mortality at 1 year

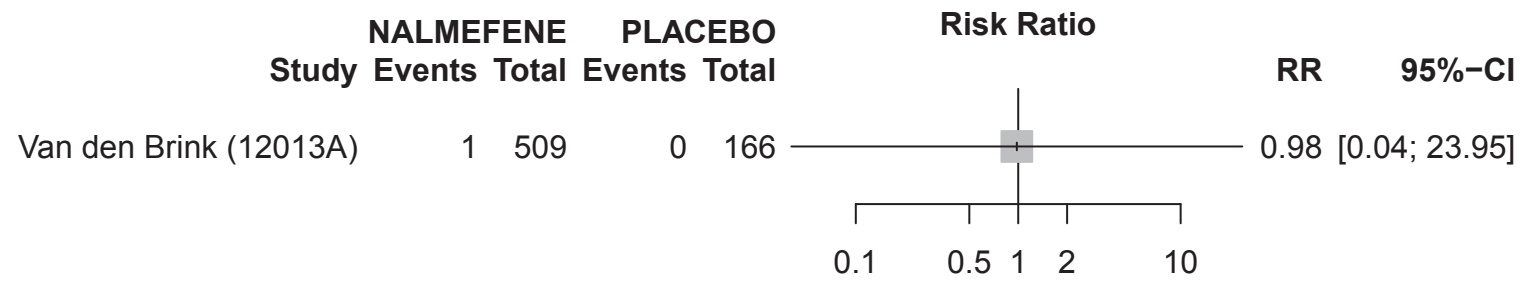

# Monthly number of HDDs at 1 year

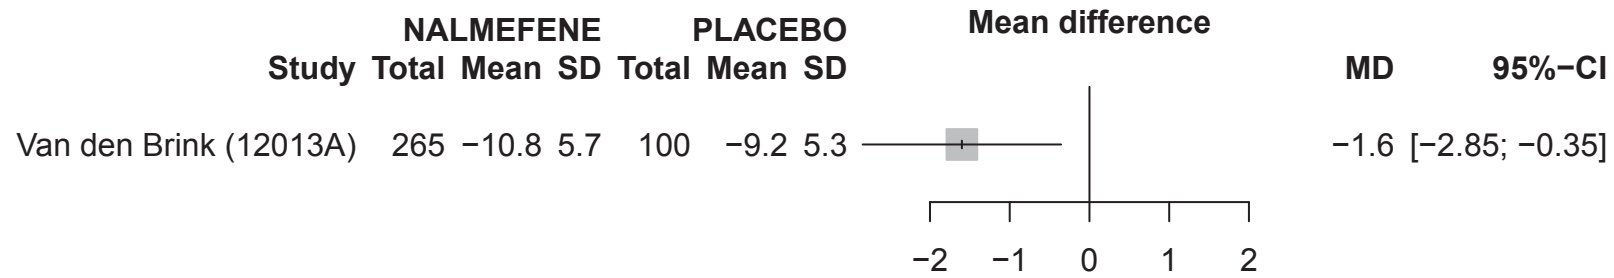

## Total alcohol consumption at 1 year

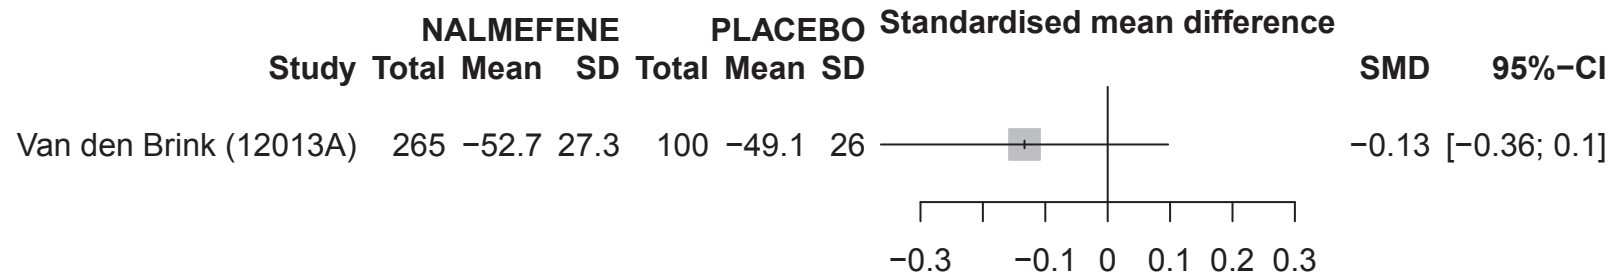

## Response at 1 year

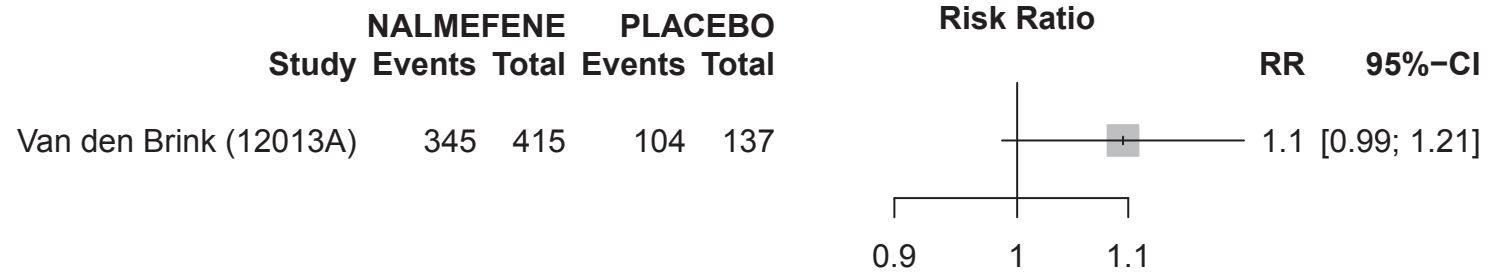

## Clinical Global Impression–Severity score at 1 year

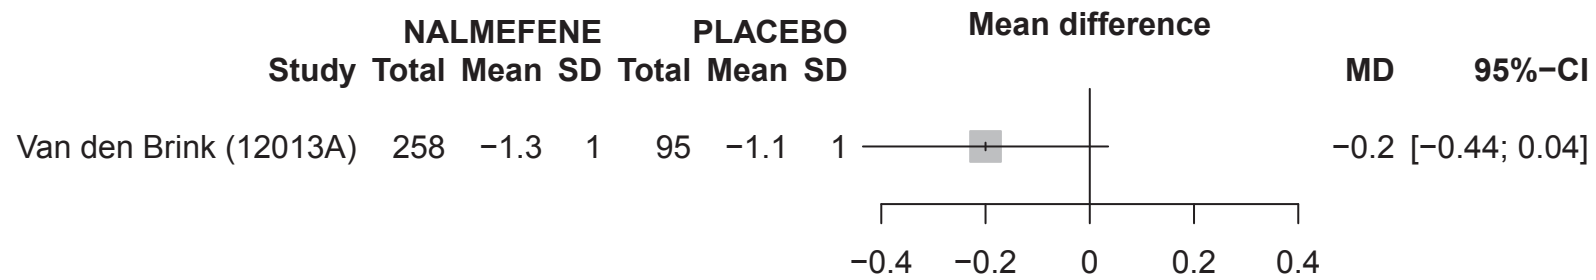

## Carbohydrate-deficient transferrin at 1 year

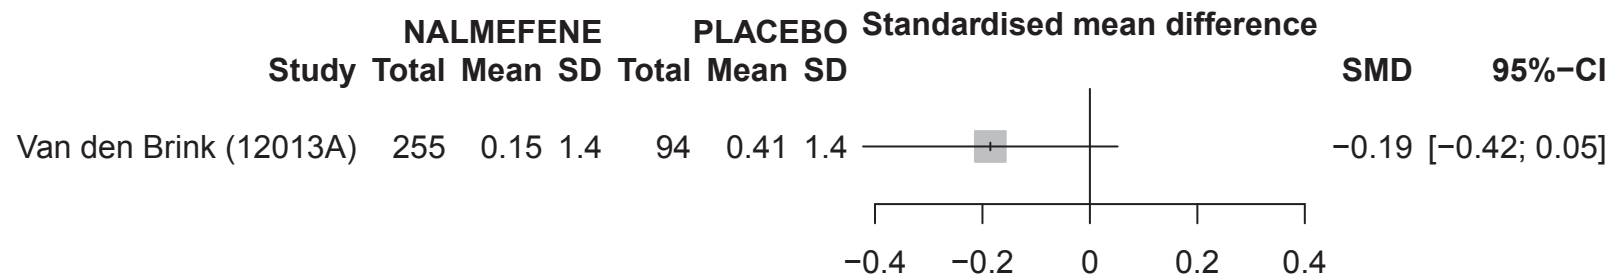

## Adverse events at 1 year

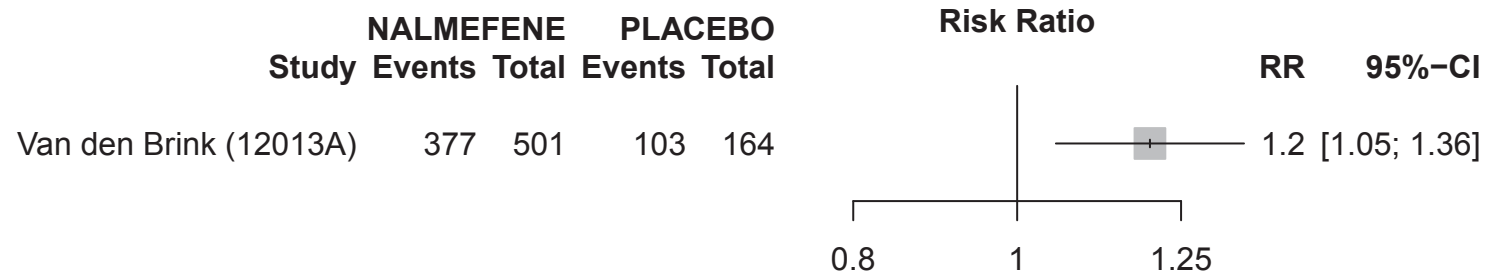

## Adverse events (LFU=F) at 1 year

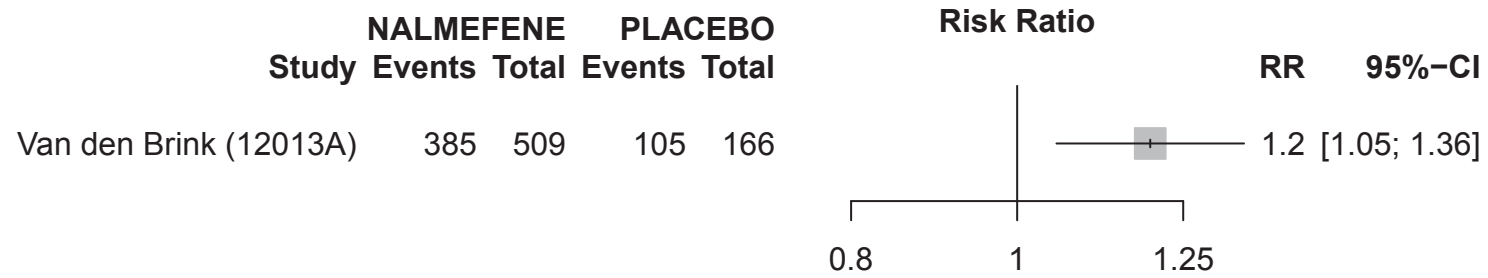



## Serious adverse events at 1 year

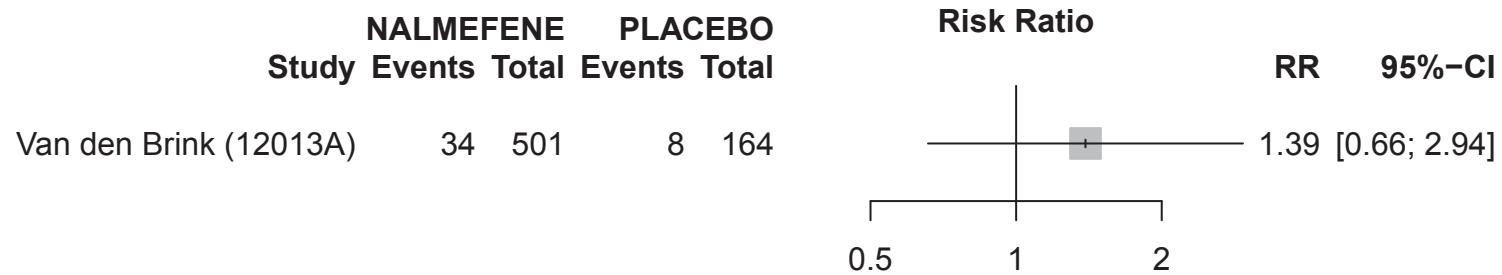

## Serious adverse events (LFU=F) at 1 year

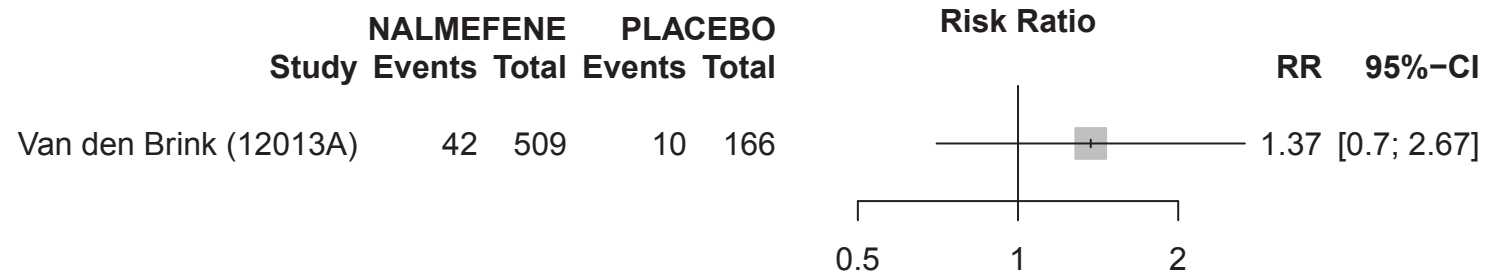

## Withdrawal from the study at 1 year

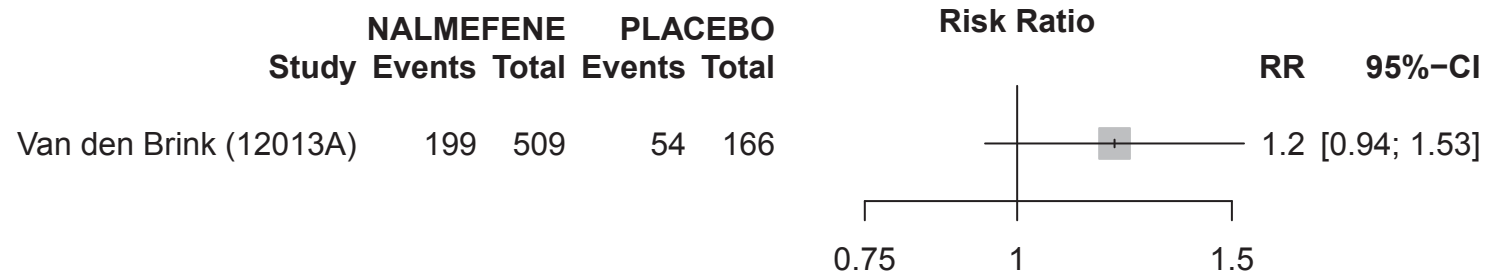

## Withdrawal from the study for safety reasons at 1 year

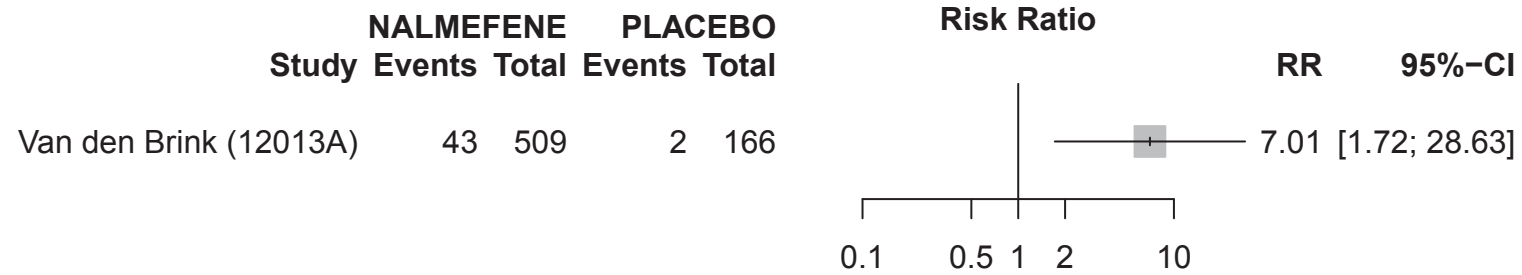

# SENSITIVITY ANALYSIS

List of outcomes for which data involving studies lasting less than 6 months are available:

**Health outcomes:**

- Mortality ;

**Alcohol consumption outcomes:**

- Monthly number of HDDs ;
- Total alcohol consumption ;
- DrInC score ;
- Alcohol Dependence Scale score ;

**Biological outcomes:**

- $\gamma$ -Glutamyltransferase ;
- Alanine-aminotransferase ;
- Mean corpuscular volume ;
- Carbohydrate-deficient transferrin ;

**Treatment safety outcomes:**

- Adverse events ;
- Serious adverse events ;
- Withdrawal from the study ;
- Withdrawal from the study for safety reasons.

# Mortality

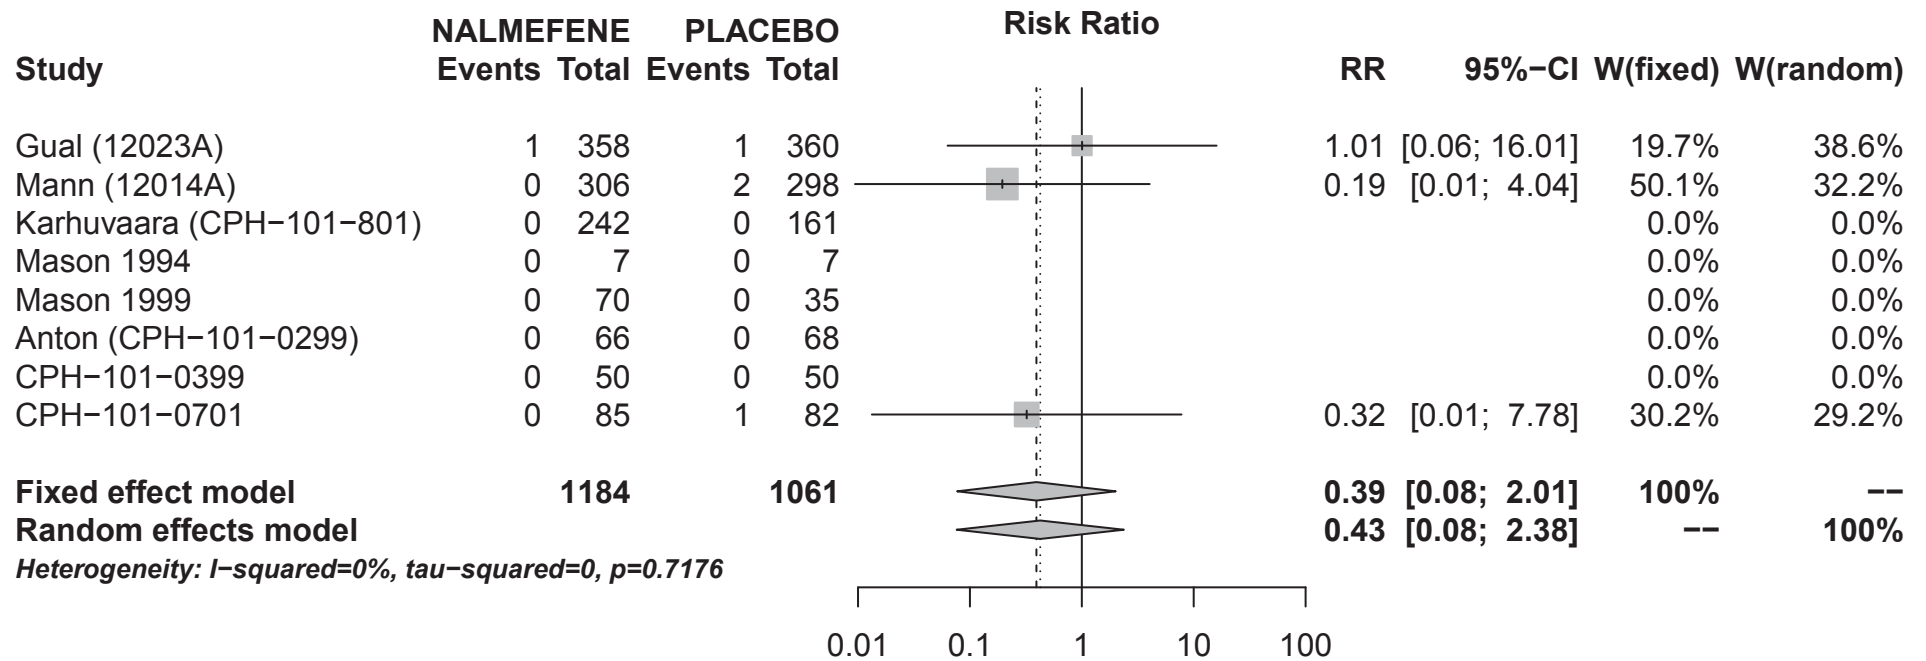

## Monthly number of HDDs

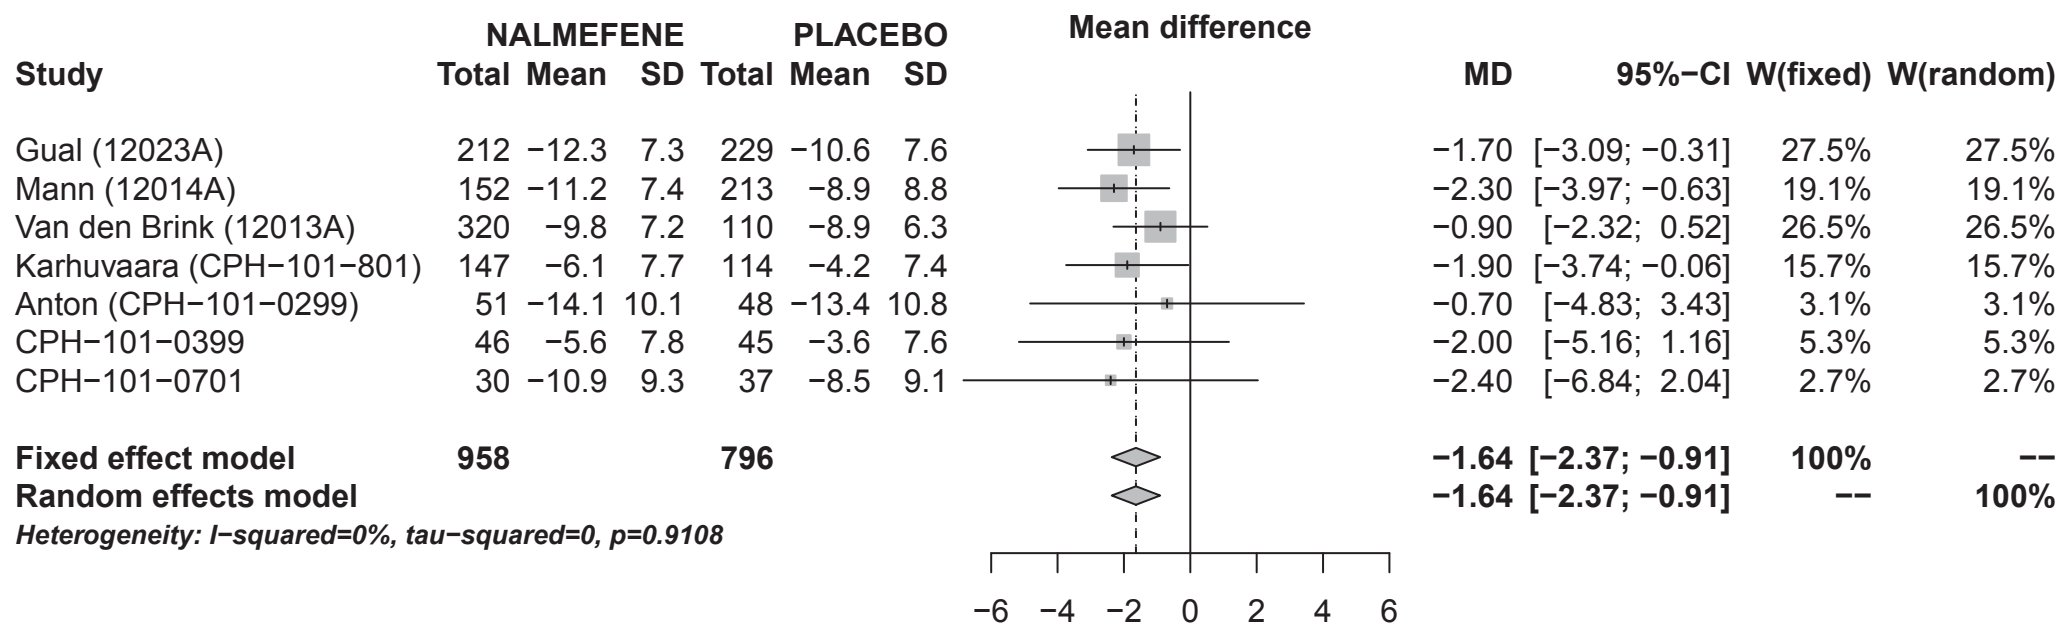



## Total alcohol consumption

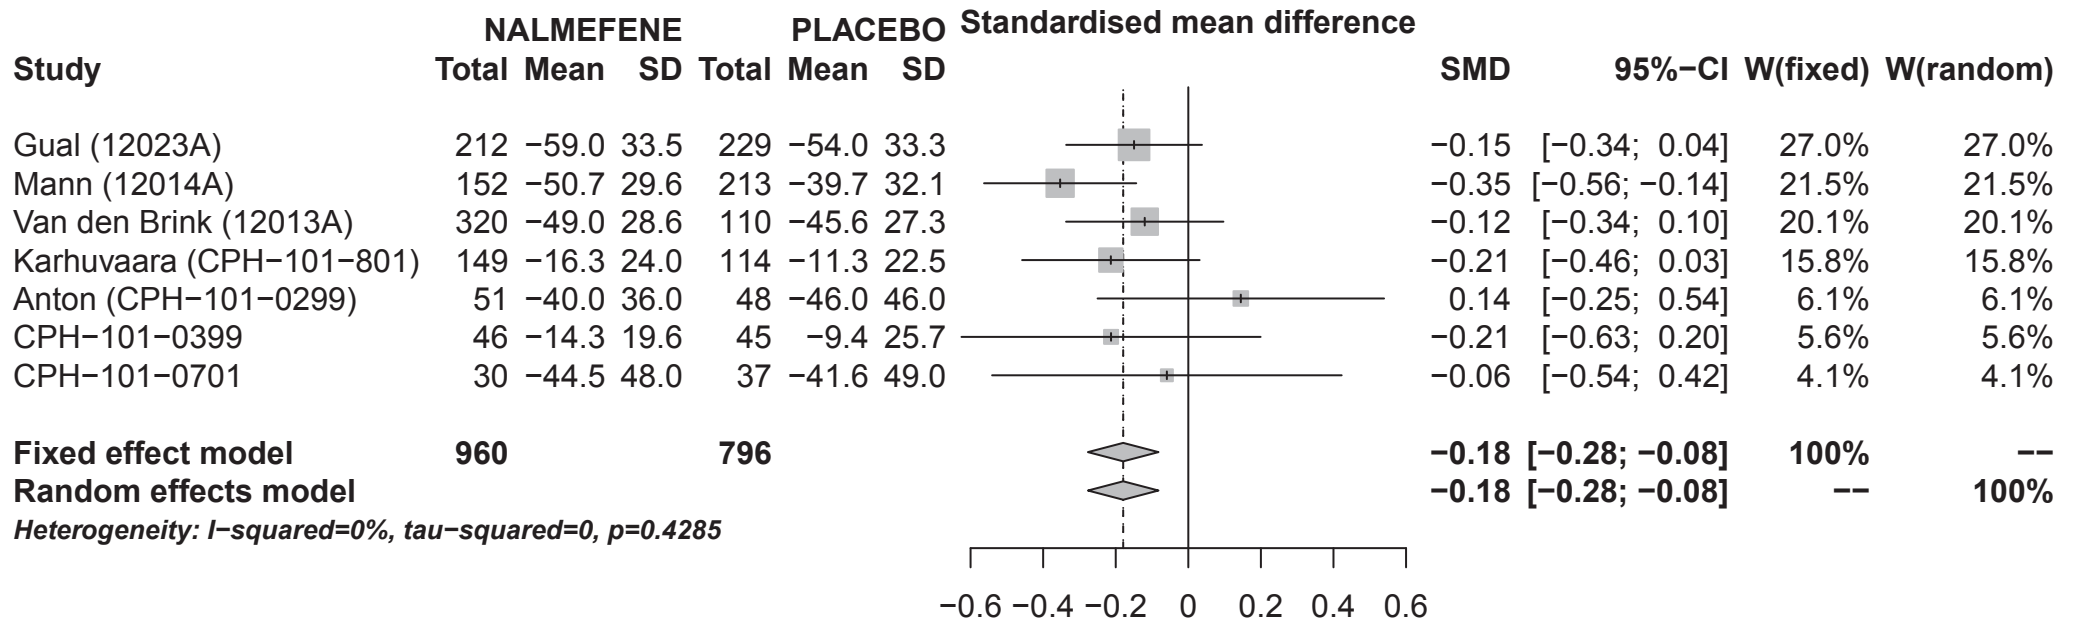

## DrInC score

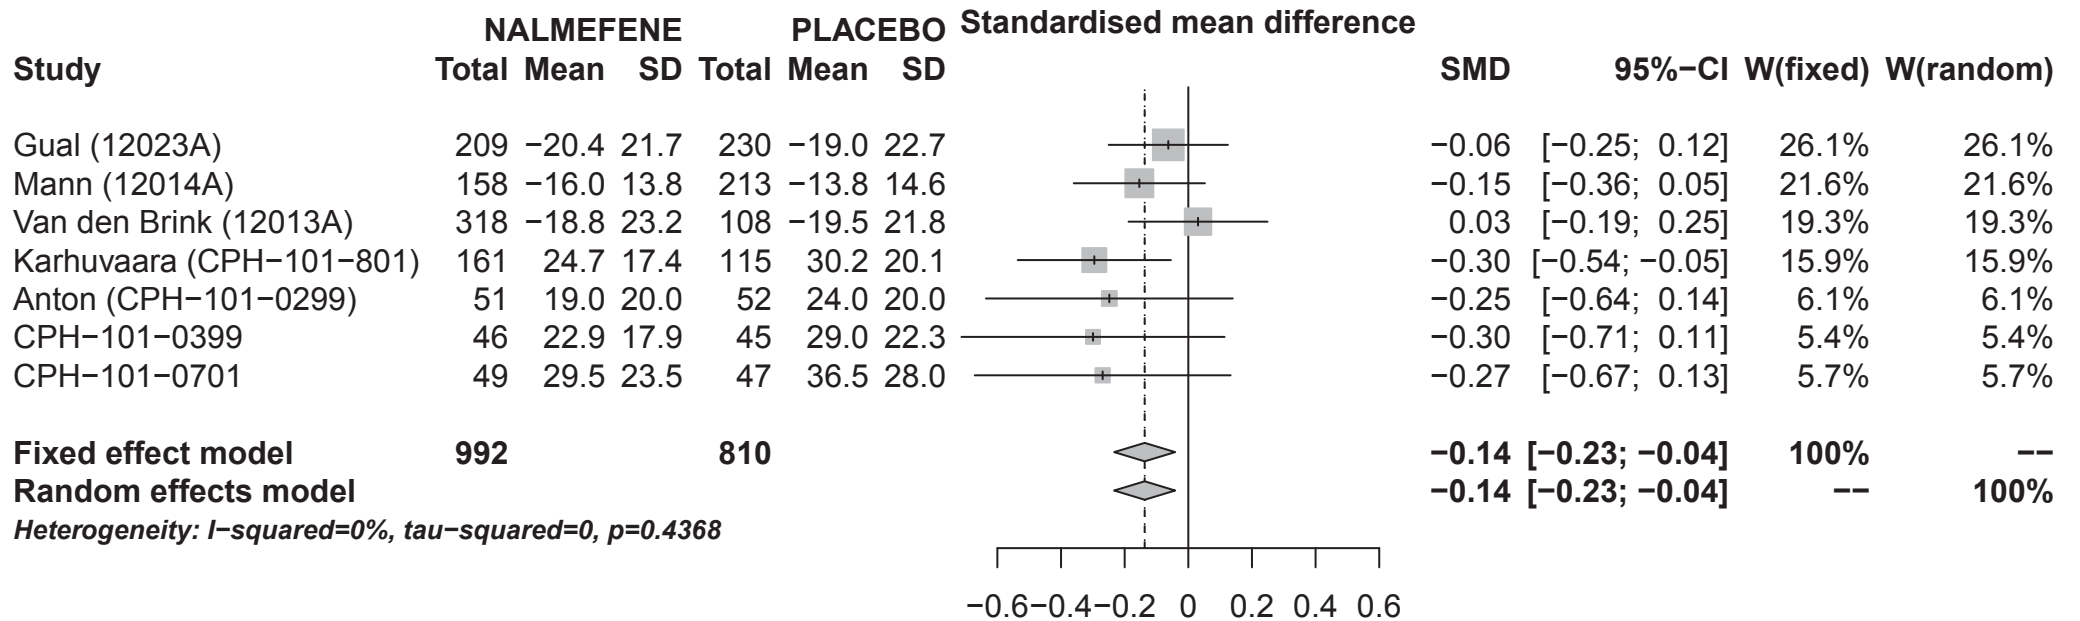

## Alcohol Dependence Scale score

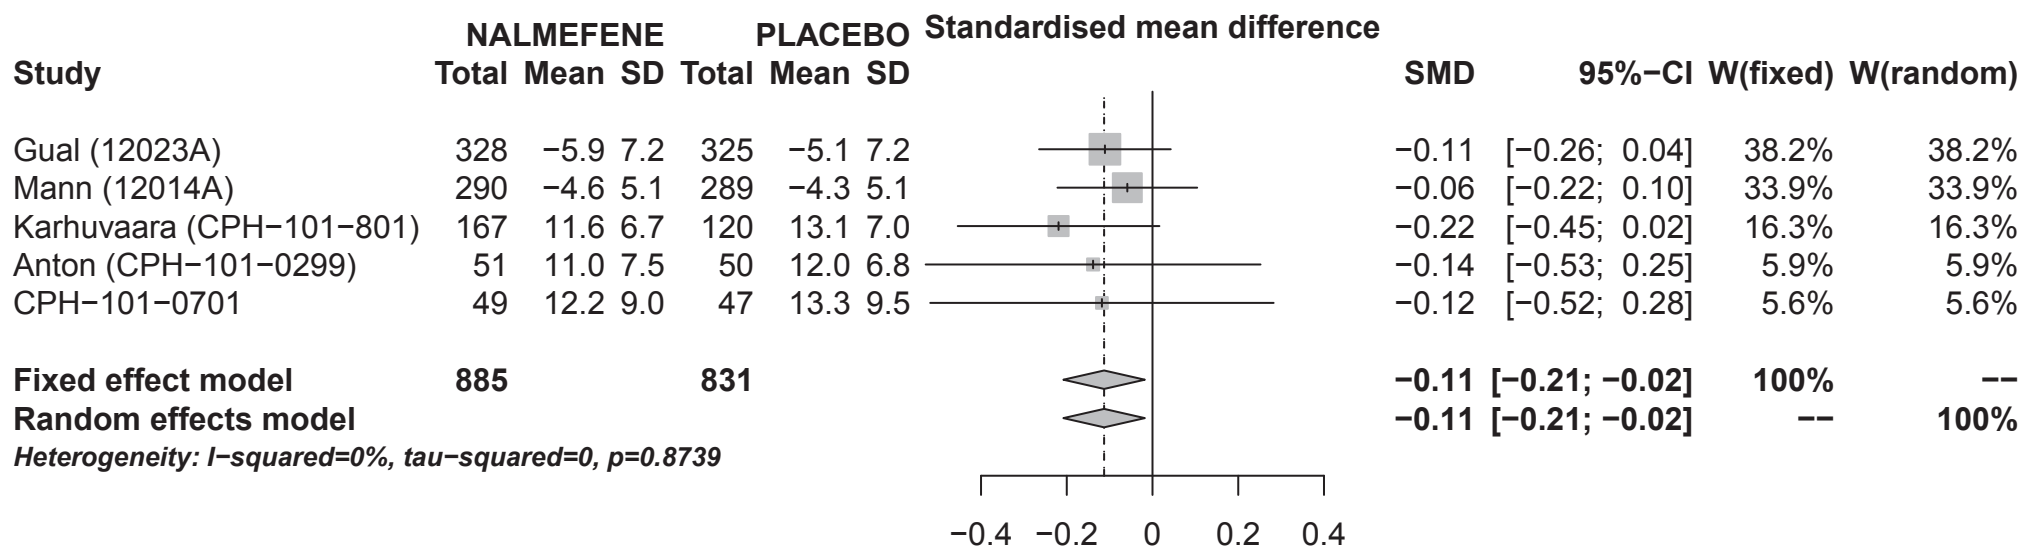

## Gamma-Glutamyltransferase

| Study                       | NALMEFENE  |      |      | PLACEBO    |       |       | Mean difference | MD            | 95%-CI                 | W(fixed)    | W(random)   |
|-----------------------------|------------|------|------|------------|-------|-------|-----------------|---------------|------------------------|-------------|-------------|
|                             | Total      | Mean | SD   | Total      | Mean  | SD    |                 |               |                        |             |             |
| Gual (12023A)               | 207        | 43.4 | NA   | 224        | 44.9  | NA    |                 | -1.50         |                        | 0.0%        | 0.0%        |
| Mann (12014A)               | 158        | 40.3 | NA   | 211        | 45.7  | NA    |                 | -5.40         |                        | 0.0%        | 0.0%        |
| Van den Brink (12013A)      | 319        | 32.2 | NA   | 108        | 34.5  | NA    |                 | -2.30         |                        | 0.0%        | 0.0%        |
| Karhuvaara (CPH-101-801)    | 148        | 77.2 | 89.1 | 115        | 115.4 | 189.8 |                 | -38.20        | [-75.74; -0.66]        | 25.8%       | 29.6%       |
| Anton (CPH-101-0299)        | 47         | 44.4 | 46.3 | 50         | 58.4  | 64.0  |                 | -14.00        | [-36.13; 8.13]         | 74.2%       | 70.4%       |
| CPH-101-0399                | 45         | 55.0 | NA   | 44         | 53.0  | NA    |                 | 2.00          |                        | 0.0%        | 0.0%        |
| <b>Fixed effect model</b>   | <b>924</b> |      |      | <b>752</b> |       |       |                 | <b>-20.24</b> | <b>[-39.31; -1.18]</b> | <b>100%</b> | <b>--</b>   |
| <b>Random effects model</b> |            |      |      |            |       |       |                 | <b>-21.15</b> | <b>[-42.80; 0.49]</b>  | <b>--</b>   | <b>100%</b> |

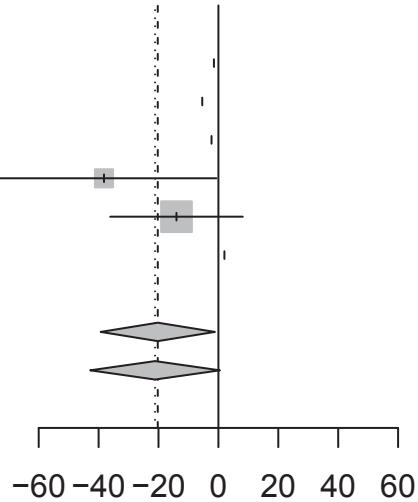

*Heterogeneity: I-squared=15.6%, tau-squared=45.61, p=0.2764*

## Alanine-aminotransferase

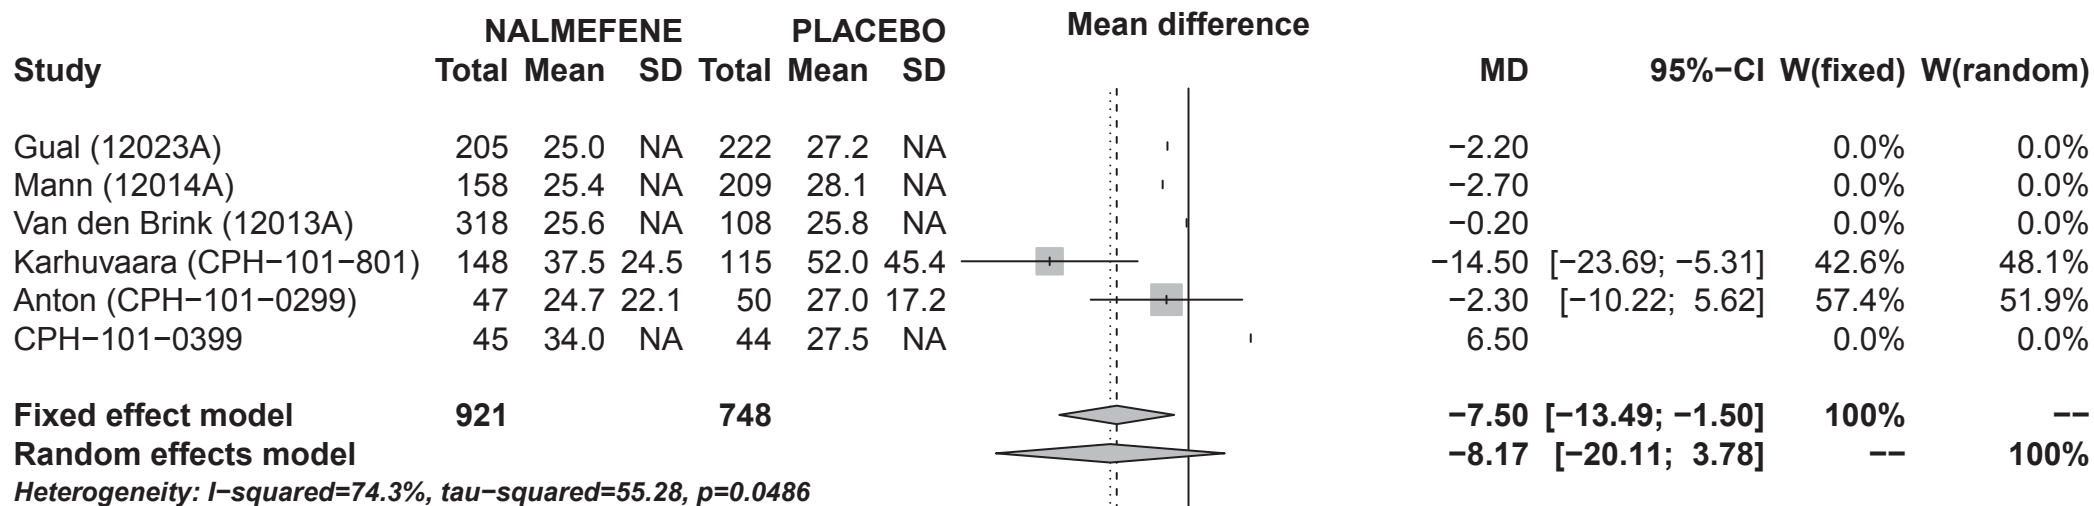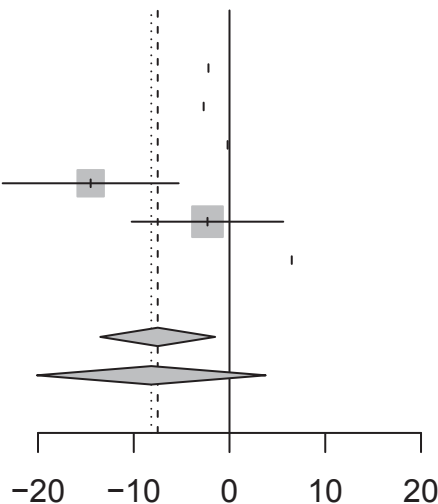

## Mean corpuscular volume

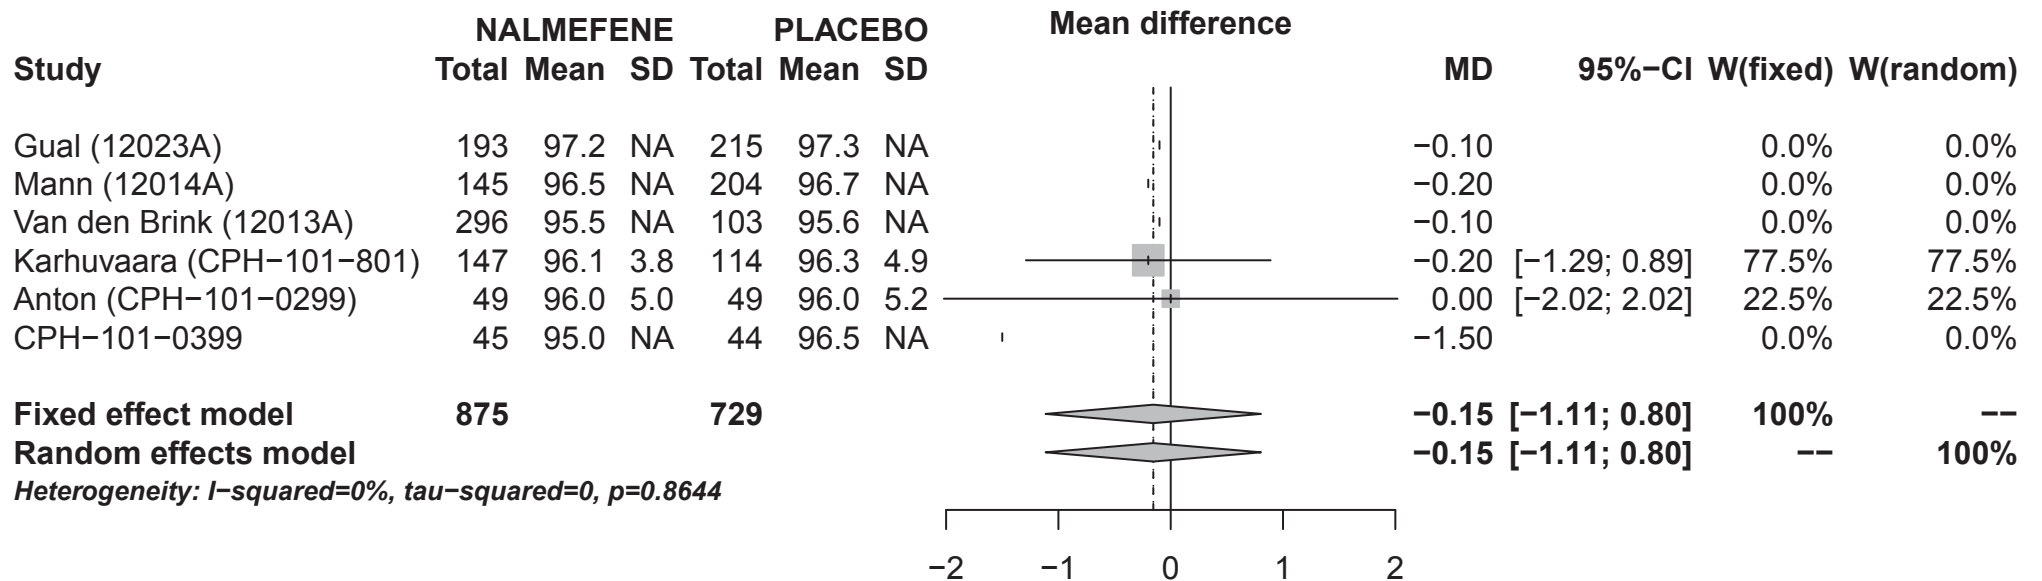

## Carbohydrate-deficient transferrin

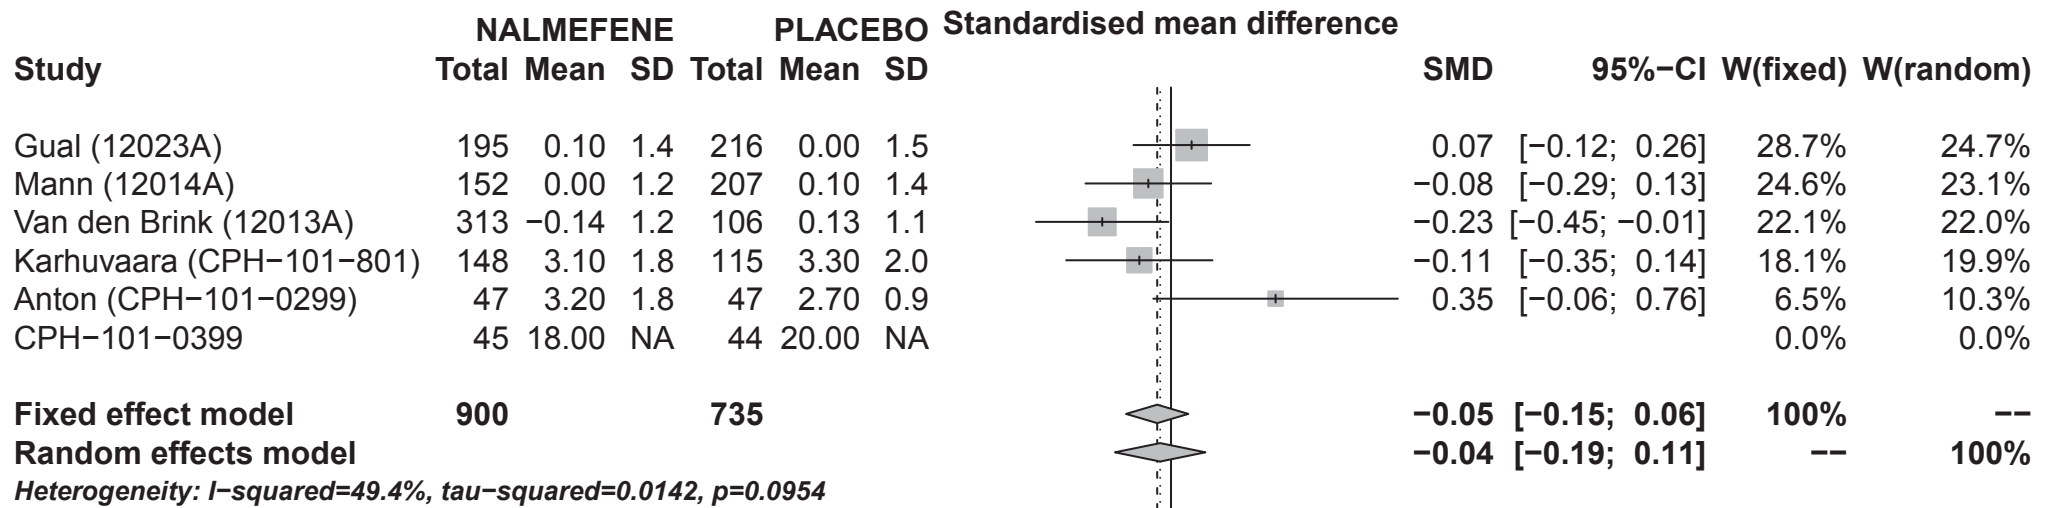

## Adverse events

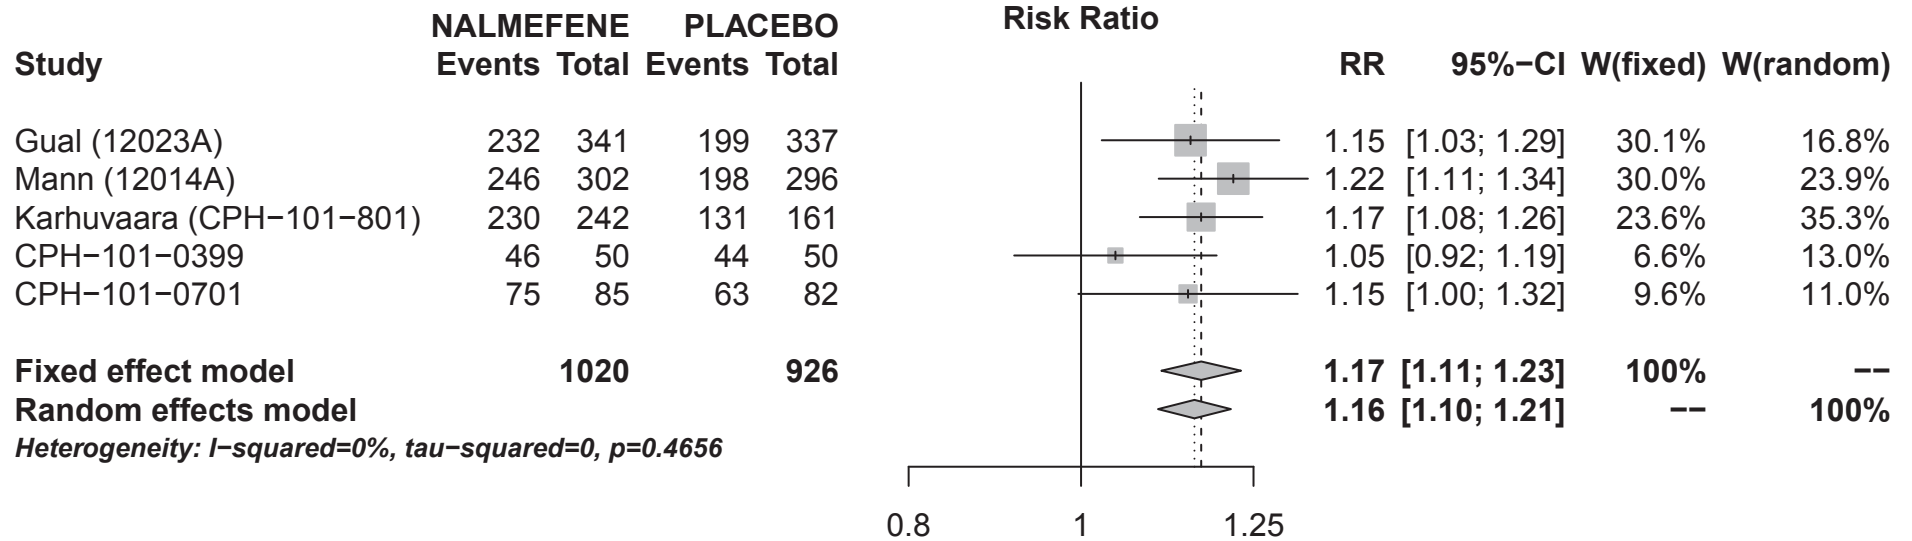



## Adverse events (LFU=F)

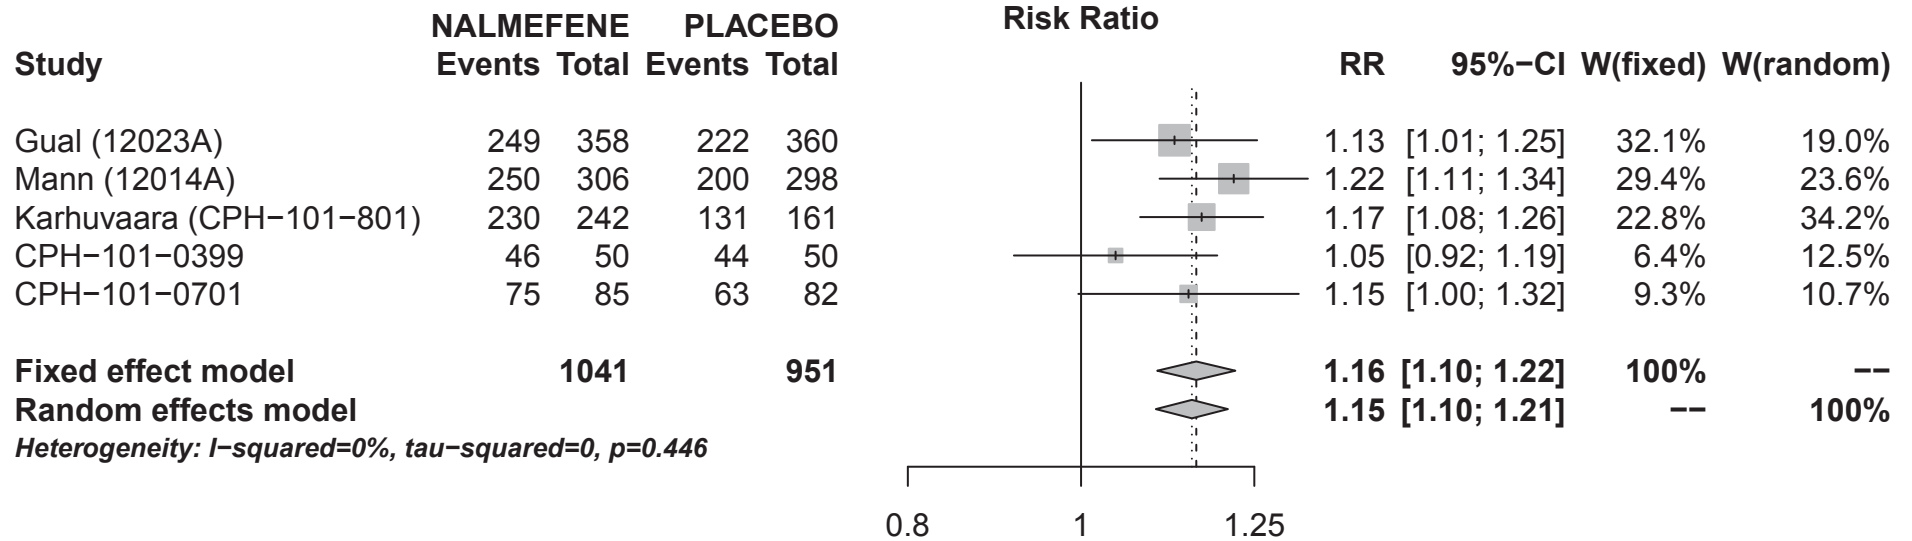

## Serious adverse events

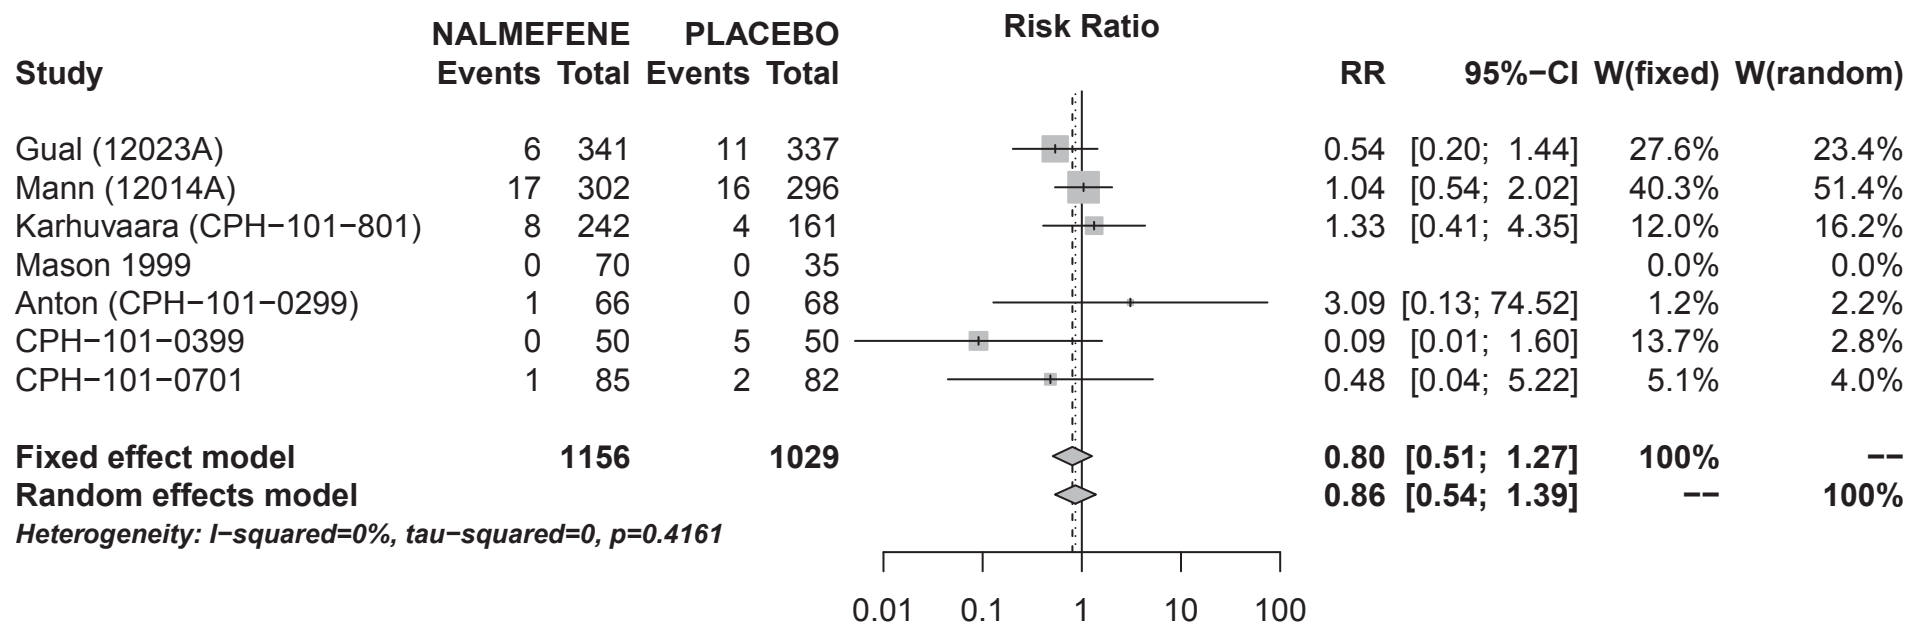

## Serious adverse events (LFU=F)

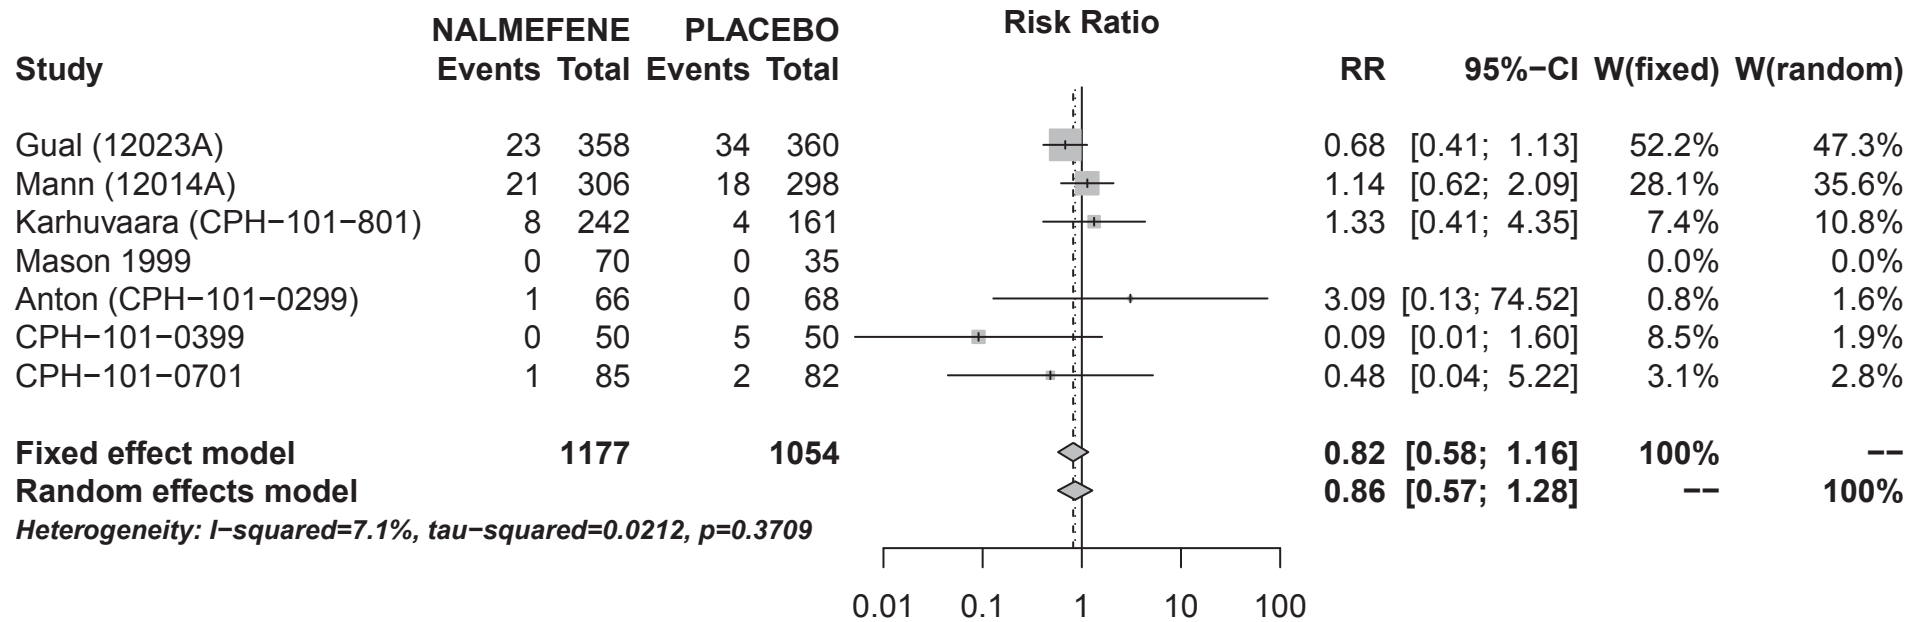

## Withdrawal from the study

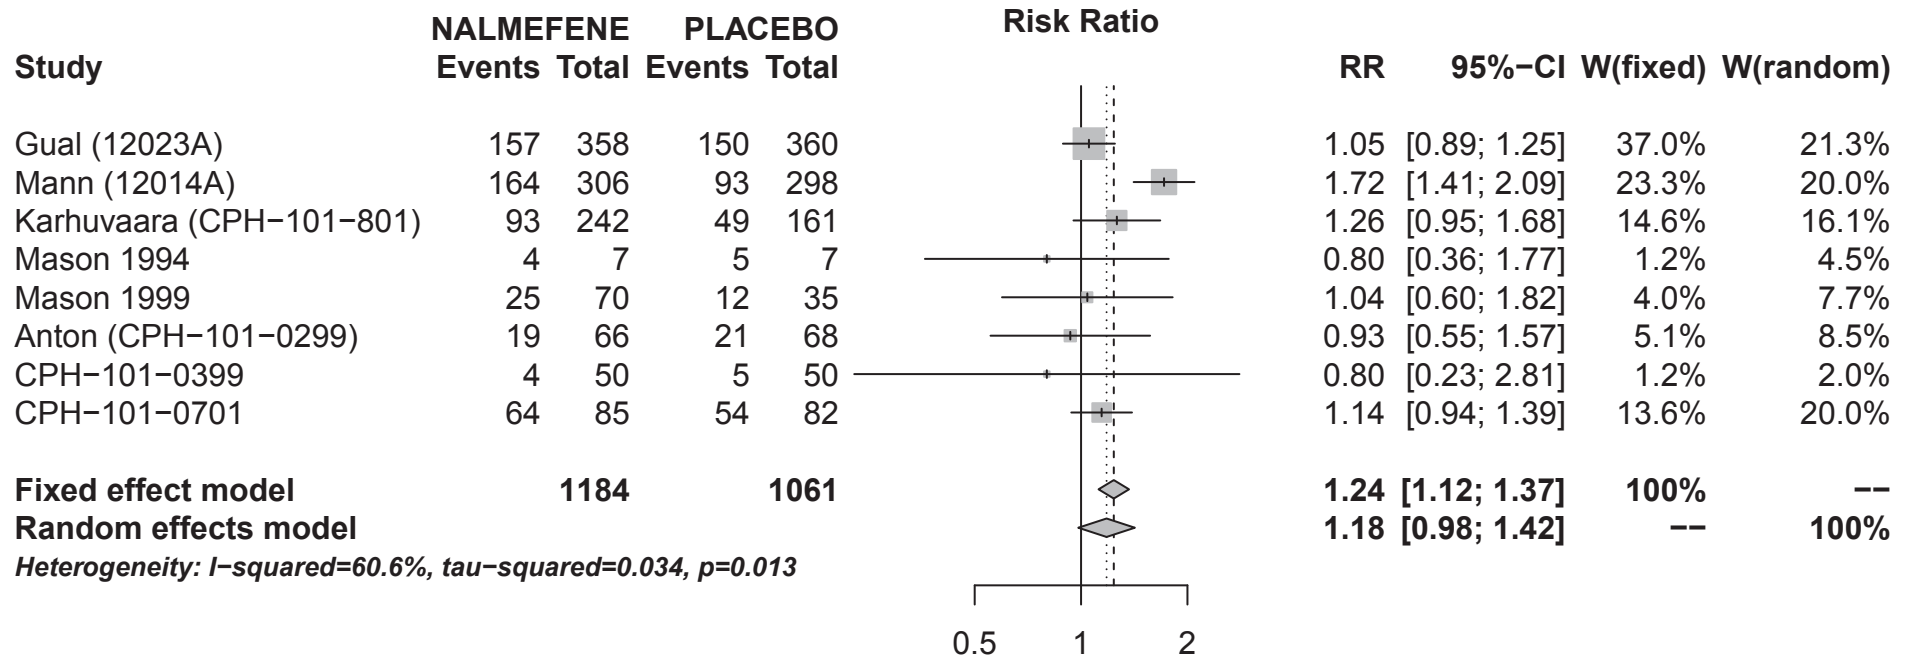

## Withdrawal from the study for safety reasons

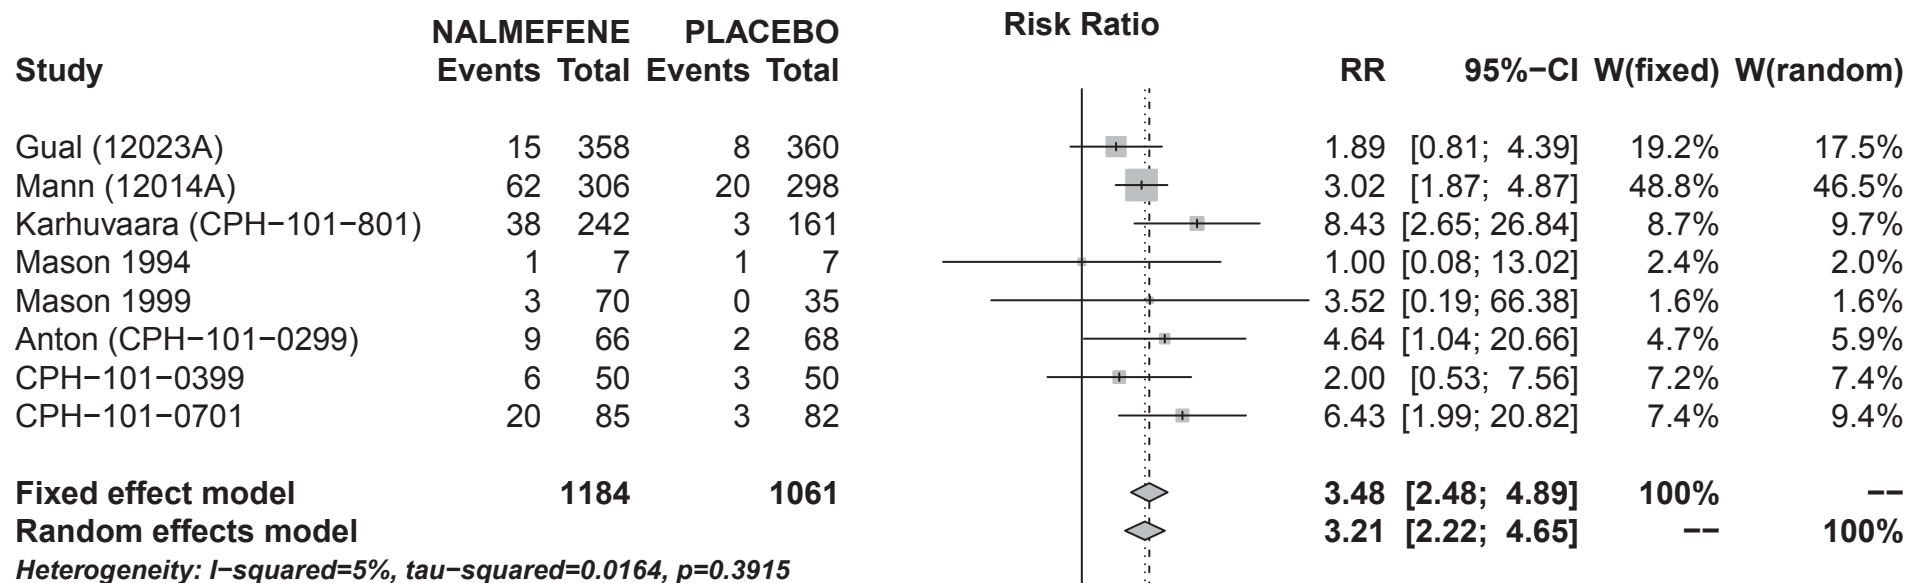

Supplement: pmed.1001924.s001.pdf [file pmed.1001924.s001.pdf]
